# Supplementary material for: Structural Insights and Docking Analysis of Adamantane-Linked 1,2,4-Triazole Derivatives as Potential 11β-HSD1 Inhibitors
Source: MDPI journal article supplement (doi:10.3390/molecules26175335), 2021-09-02
Supplement: s1 [file s1]

# Structural Insights and Docking Analysis of Adamantane-Linked 1,2,4-Triazole Derivatives as Potential 11 $\beta$ -HSD1 Inhibitors

Doaa A. Osman<sup>1</sup>, Mario A. Macías<sup>2</sup>, Lamya H. Al-Wahaibi<sup>3,\*</sup>, Nora H. Al-Shaalan<sup>3</sup>, Luke S. Zondagh<sup>4</sup>, Jacques Joubert<sup>4</sup>, Santiago Garcia-Granda<sup>1</sup> and Ali A. El-Emam<sup>5,\*</sup>

**Table S1.** The cross-docking results of the number of RMSD values of the native and non-native ligands  $\leq 2$  Å. Columns represent the enzymes and rows represent the co-crystallized ligands.

| PDB ID  | 2RBE     | 3HFG     | 4C7J     | 4C7K     | 4HX5     | 4IJU     | 4IJV     | 4IJW     | 4K1L     | 5QII     |
|---------|----------|----------|----------|----------|----------|----------|----------|----------|----------|----------|
| 2RBE    | <b>4</b> | 0        | 0        | 1        | 1        | 0        | 1        | 3        | 1        | 0        |
| 3HFG    | 0        | <b>2</b> | 2        | 0        | 0        | 0        | 2        | 4        | 2        | 2        |
| 4C7J    | 0        | 0        | <b>4</b> | 4        | 0        | 0        | 0        | 0        | 0        | 0        |
| 4C7K    | 1        | 1        | 4        | <b>3</b> | 1        | 1        | 0        | 0        | 0        | 0        |
| 4HX5    | 0        | 0        | 0        | 0        | <b>4</b> | 2        | 0        | 0        | 0        | 0        |
| 4IJU    | 0        | 0        | 0        | 0        | 0        | <b>5</b> | 0        | 0        | 0        | 0        |
| 4IJV    | 0        | 4        | 1        | 0        | 3        | 0        | <b>5</b> | 2        | 1        | 1        |
| 4IJW    | 0        | 3        | 2        | 3        | 1        | 0        | 3        | <b>5</b> | 2        | 4        |
| 4K1L    | 1        | 2        | 2        | 1        | 2        | 1        | 2        | 4        | <b>0</b> | 5        |
| 5QII    | 0        | 5        | 1        | 4        | 3        | 0        | 2        | 5        | 1        | <b>5</b> |
| Average | 6        | 17       | 16       | 16       | 15       | 9        | 15       | 23       | 7        | 17       |

Bold figures = Self-docking of native ligand into respective native enzyme.

No. poses color scale (Å)

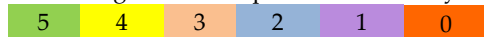

**Table S2.** The cross-docking results with the lowest RMSD values of the native and non-native ligands. Columns represent the enzymes and rows represent the co-crystallized ligands.

| PDB ID  | 2RBE        | 3HFG        | 4C7J        | 4C7K        | 4HX5        | 4IJU        | 4IJV        | 4IJW        | 4K1L        | 5QII        |
|---------|-------------|-------------|-------------|-------------|-------------|-------------|-------------|-------------|-------------|-------------|
| 2RBE    | <b>0.39</b> | 2.09        | 2.00        | 1.46        | 1.01        | 2.02        | 1.82        | 1.77        | 1.88        | 2.03        |
| 3HFG    | 3.56        | <b>1.36</b> | 1.27        | 3.19        | 2.48        | 3.90        | 1.60        | 1.30        | 1.47        | 1.83        |
| 4C7J    | 2.87        | 2.42        | <b>0.79</b> | 1.31        | 2.20        | 2.07        | <b>7.86</b> | 3.66        | 2.33        | 2.78        |
| 4C7K    | 1.45        | 1.68        | 0.86        | <b>1.11</b> | 1.83        | 1.41        | 3.30        | 3.03        | 3.34        | 3.27        |
| 4HX5    | 3.17        | <b>6.01</b> | 2.22        | 2.47        | <b>1.00</b> | 1.70        | <b>5.76</b> | <b>5.73</b> | <b>5.87</b> | <b>5.94</b> |
| 4IJU    | 2.07        | 2.46        | 2.18        | 2.01        | 2.90        | <b>0.92</b> | 3.65        | 3.59        | 2.14        | 3.70        |
| 4IJV    | 3.28        | 1.11        | 1.25        | 2.39        | 0.84        | 3.13        | <b>0.41</b> | 1.13        | 1.09        | 1.50        |
| 4IJW    | 3.19        | 0.82        | 0.48        | 0.72        | 1.01        | 2.81        | 0.88        | <b>0.64</b> | 1.57        | 0.87        |
| 4K1L    | 0.89        | 1.17        | 1.77        | 1.95        | 1.13        | 1.49        | 1.47        | 1.34        | <b>2.08</b> | 1.11        |
| 5QII    | 2.82        | 0.93        | 0.88        | 0.96        | 0.82        | 2.72        | 0.90        | 0.52        | 1.07        | <b>0.79</b> |
| Average | 2.37        | 2.00        | 1.37        | 1.76        | 1.52        | 2.22        | 2.77        | 2.28        | 2.28        | 2.38        |

Bold figures = Self-docking of native ligand into respective native enzyme.

No. poses color scale (Å)

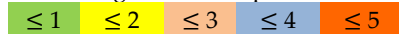

**Table S3.** The cross-docking results of the average RMSD values of the native and non-native ligands. Columns represent the enzymes and rows represent the co-crystallized ligands.

| PDB ID  | 2RBE | 3HFG  | 4C7J | 4C7K | 4HX5 | 4IJU | 4IJV  | 4IJW | 4K1L | 5QII |
|---------|------|-------|------|------|------|------|-------|------|------|------|
| 2RBE    | 1.80 | 3.04  | 4.48 | 2.86 | 4.29 | 4.42 | 4.39  | 1.95 | 3.64 | 5.21 |
| 3HFG    | 3.81 | 4.59  | 2.66 | 4.32 | 2.92 | 7.29 | 5.65  | 1.76 | 2.26 | 4.43 |
| 4C7J    | 3.13 | 5.73  | 1.31 | 1.72 | 4.84 | 2.35 | 8.03  | 4.53 | 3.52 | 4.25 |
| 4C7K    | 4.39 | 3.72  | 2.48 | 2.05 | 3.15 | 3.54 | 5.62  | 4.85 | 3.48 | 3.39 |
| 4HX5    | 9.48 | 10.13 | 3.17 | 2.64 | 1.39 | 2.17 | 7.69  | 6.04 | 6.22 | 6.38 |
| 4IJU    | 2.26 | 3.82  | 4.30 | 3.28 | 5.05 | 1.51 | 7.45  | 4.46 | 2.75 | 3.77 |
| 4IJV    | 5.28 | 1.56  | 4.68 | 5.38 | 2.84 | 7.21 | 0.98  | 1.97 | 5.07 | 6.56 |
| 4IJW    | 5.36 | 1.77  | 4.96 | 1.71 | 3.08 | 3.72 | 3.33  | 1.34 | 3.48 | 2.23 |
| 4K1L    | 4.26 | 3.02  | 3.46 | 3.04 | 2.76 | 3.25 | 2.82  | 1.70 | 2.94 | 1.40 |
| 5QII    | 3.52 | 1.29  | 5.81 | 1.48 | 1.55 | 3.71 | 4.58  | 1.93 | 2.54 | 0.96 |
| Average | 4.33 | 3.87  | 3.73 | 2.85 | 3.19 | 3.92 | 5.053 | 3.05 | 3.59 | 3.86 |

Bold figures = Self-docking of native ligand into respective native enzyme.

No. poses color scale (Å) ≤ 1 ≤ 2 ≤ 3 ≤ 4 > 4

**Table S4.** The cross-docking binding affinity results of native and non-native ligands. Rows represent the enzymes and columns represent the co-crystallized ligands.

| PDB ID | 2RBE   | 3HFG   | 4C7J   | 4C7K   | 4HX5   | 4IJU   | 4IJV   | 4IJW   | 4K1L   | 5QII   |
|--------|--------|--------|--------|--------|--------|--------|--------|--------|--------|--------|
| 2RBE   | - 6.56 | - 7.26 | - 7.78 | - 6.92 | - 7.26 | - 6.84 | - 6.63 | - 6.45 | - 6.63 | - 6.68 |
| 3HFG   | - 6.01 | - 8.09 | - 7.91 | - 7.55 | - 8.59 | - 7.25 | - 7.99 | - 6.70 | - 6.56 | - 7.22 |
| 4C7J   | - 5.77 | - 7.51 | - 8.37 | - 7.87 | - 8.87 | - 7.18 | - 7.53 | - 7.08 | - 6.31 | - 7.37 |
| 4C7K   | - 6.28 | - 7.53 | - 8.61 | - 8.80 | - 9.25 | - 7.63 | - 7.32 | - 7.26 | - 6.66 | - 7.67 |
| 4HX5   | - 5.77 | - 7.44 | - 7.65 | - 7.34 | - 9.85 | - 6.73 | - 7.37 | - 7.28 | - 6.45 | - 7.49 |
| 4IJU   | - 6.24 | - 8.12 | - 8.19 | - 8.32 | - 8.71 | - 7.58 | - 7.88 | - 7.09 | - 6.69 | - 7.42 |
| 4IJV   | - 6.15 | - 8.39 | - 7.79 | - 8.07 | - 8.47 | - 6.84 | - 8.32 | - 7.25 | - 6.53 | - 7.55 |
| 4IJW   | - 5.91 | - 8.01 | - 7.51 | - 7.79 | - 8.16 | - 7.00 | - 7.79 | - 7.37 | - 6.66 | - 7.96 |
| 4K1L   | - 6.61 | - 7.22 | - 7.77 | - 8.05 | - 7.79 | - 6.94 | - 6.75 | - 6.91 | - 7.05 | - 6.86 |
| 5QII   | - 5.92 | - 7.65 | - 8.41 | - 8.36 | - 8.08 | - 7.23 | - 7.14 | - 7.33 | - 6.90 | - 7.30 |

**Table S5.** Tabulated binding affinity scores of **4YQ**, compounds **1-3** and series **D** obtained from the built-in scoring function of MOE, S-score.

| Compound | Binding affinity scores (S-score) (kcal/mol) |
|----------|----------------------------------------------|
| 4YQ      | - 8.20                                       |
| 1        | - 8.30                                       |
| 2        | - 7.70                                       |
| 3        | - 7.83                                       |
| D1       | - 8.24                                       |
| D2       | - 8.29                                       |
| D3       | - 7.98                                       |
| D4       | - 8.08                                       |
| D5       | - 8.02                                       |
| D6       | - 8.48                                       |
| D7       | - 8.31                                       |
| D8       | - 8.19                                       |
| D9       | - 8.29                                       |

**Table S6.** Tabulated and visual representations of binding interactions of **4YQ** within **4C7J** active site using PLIP and Pymol molecular graphics system.

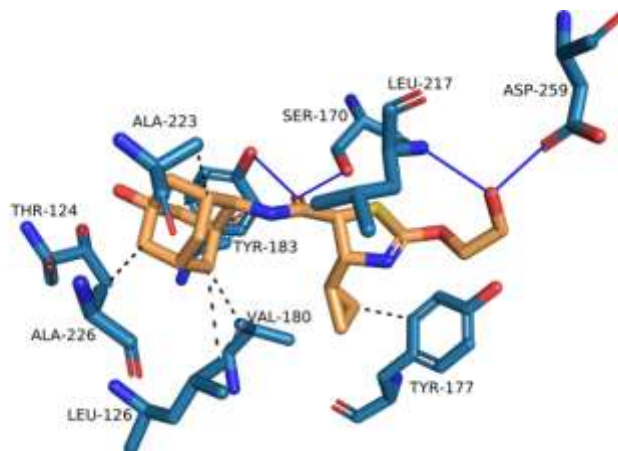

| Residue | Amino acid | Distance (Å) | Type of interaction |
|---------|------------|--------------|---------------------|
| 121A    | ILE        | 3.71         | Hydrophobic         |
| 126A    | LEU        | 3.89         | Hydrophobic         |
| 177A    | TYR        | 3.85         | Hydrophobic         |
| 180A    | VAL        | 3.86         | Hydrophobic         |
| 183A    | TYR        | 3.22         | Hydrophobic         |
| 183A    | TYR        | 3.60         | Hydrophobic         |
| 223A    | ALA        | 3.84         | Hydrophobic         |
| 170A    | SER        | 2.63         | Hydrogen            |
| 183A    | TYR        | 2.77         | Hydrogen            |
| 217A    | LEU        | 2.40         | Hydrogen            |
| 259A    | ASP        | 3.02         | Hydrogen            |

**Table S7.** Tabulated and visual representations of binding interactions of compound **1** within 4C7J active site using PLIP and Pymol molecular graphics system.

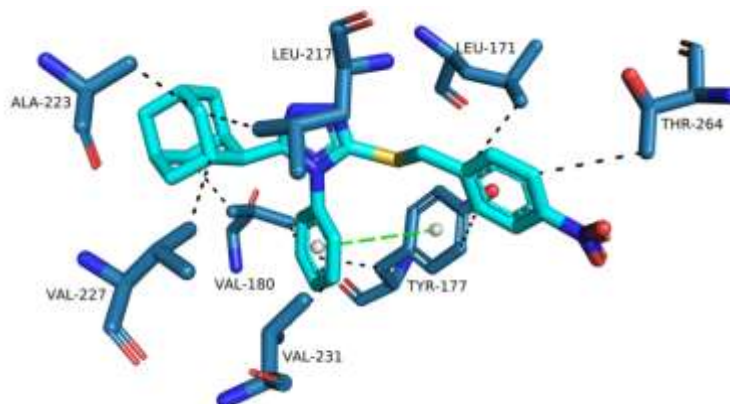

| Residue | Amino acid | Distance (Å) | Type of interaction    |
|---------|------------|--------------|------------------------|
| 171A    | LEU        | 3.91         | Hydrophobic            |
| 177A    | TYR        | 3.71         | Hydrophobic            |
| 177A    | TYR        | 3.78         | Hydrophobic            |
| 180A    | VAL        | 3.55         | Hydrophobic            |
| 180A    | VAL        | 3.68         | Hydrophobic            |
| 217A    | LEU        | 3.49         | Hydrophobic            |
| 223A    | ALA        | 3.52         | Hydrophobic            |
| 227A    | VAL        | 3.76         | Hydrophobic            |
| 231A    | VAL        | 3.49         | Hydrophobic            |
| 264A    | THR        | 3.73         | Hydrophobic            |
| 177A    | TYR        | 4.76         | $\pi$ - $\pi$ stacking |

**Table S8.** Tabulated and visual representations of binding interactions of compound **2** within 4C7J active site using PLIP and Pymol molecular graphics system.

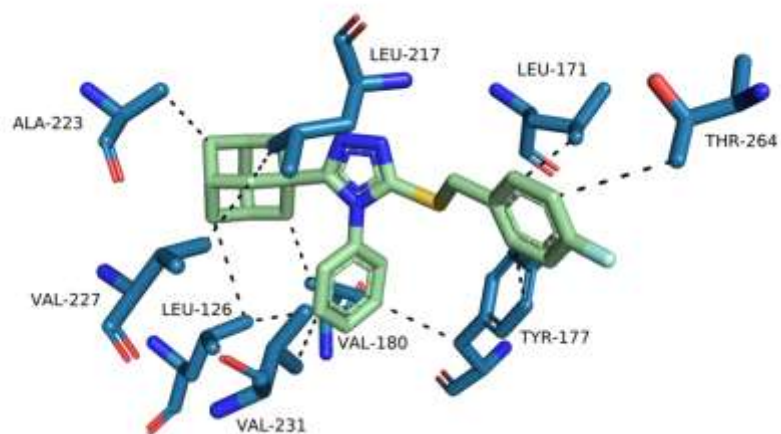

| Residue | Amino acid | Distance (Å) | Type of interaction |
|---------|------------|--------------|---------------------|
| 126A    | LEU        | 3.77         | Hydrophobic         |
| 126A    | LEU        | 3.13         | Hydrophobic         |
| 171A    | LEU        | 3.96         | Hydrophobic         |
| 177A    | TYR        | 3.48         | Hydrophobic         |
| 177A    | TYR        | 3.53         | Hydrophobic         |
| 180A    | VAL        | 3.67         | Hydrophobic         |
| 180A    | VAL        | 3.58         | Hydrophobic         |
| 217A    | LEU        | 3.40         | Hydrophobic         |
| 223A    | ALA        | 3.61         | Hydrophobic         |
| 227A    | VAL        | 3.84         | Hydrophobic         |
| 231A    | VAL        | 3.43         | Hydrophobic         |
| 264A    | THR        | 3.70         | Hydrophobic         |

**Table S9.** Tabulated and visual representations of binding interactions of compound **3** within 4C7J active site using PLIP and Pymol molecular graphics system.

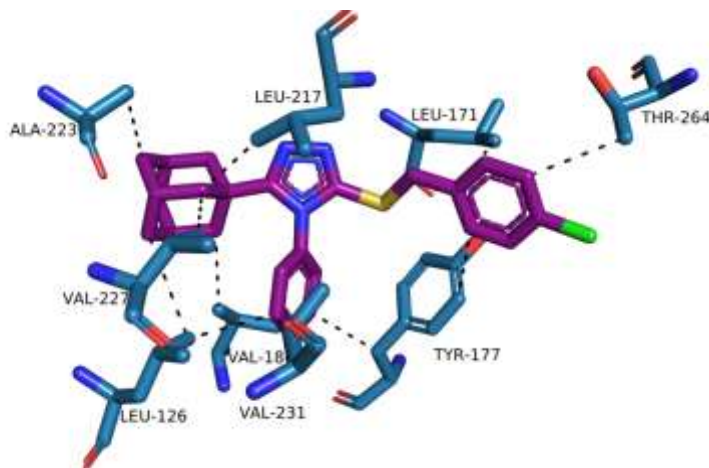

| Residue | Amino acid | Distance (Å) | Type of interaction |
|---------|------------|--------------|---------------------|
| 126A    | LEU        | 3.77         | Hydrophobic         |
| 126A    | LEU        | 3.14         | Hydrophobic         |
| 171A    | LEU        | 3.96         | Hydrophobic         |
| 177A    | TYR        | 3.46         | Hydrophobic         |
| 177A    | TYR        | 3.53         | Hydrophobic         |
| 180A    | VAL        | 3.65         | Hydrophobic         |
| 180A    | VAL        | 3.58         | Hydrophobic         |
| 217A    | LEU        | 3.40         | Hydrophobic         |
| 223A    | ALA        | 3.62         | Hydrophobic         |
| 227A    | VAL        | 3.86         | Hydrophobic         |
| 231A    | VAL        | 3.43         | Hydrophobic         |
| 264A    | THR        | 3.76         | Hydrophobic         |

**Table S10.** Tabulated and visual representations of binding interactions of compound **D1** within 4C7J active site using PLIP and Pymol molecular graphics system.

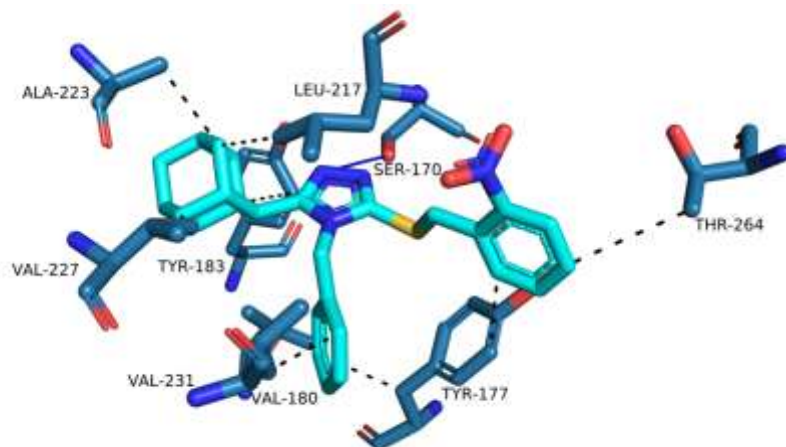

| Residue | Amino acid | Distance (Å) | Type of interaction |
|---------|------------|--------------|---------------------|
| 177A    | TYR        | 3.40         | Hydrophobic         |
| 177A    | TYR        | 3.48         | Hydrophobic         |
| 180A    | VAL        | 3.69         | Hydrophobic         |
| 183A    | TYR        | 3.98         | Hydrophobic         |
| 217A    | LEU        | 3.72         | Hydrophobic         |
| 223A    | ALA        | 3.44         | Hydrophobic         |
| 227A    | VAL        | 3.85         | Hydrophobic         |
| 231A    | VAL        | 3.27         | Hydrophobic         |
| 264A    | THR        | 3.90         | Hydrophobic         |
| 170A    | SER        | 3.00         | Hydrogen            |



**Table S11.** Tabulated and visual representations of binding interactions of compound **D2** within 4C7J active site using PLIP and Pymol molecular graphics system.

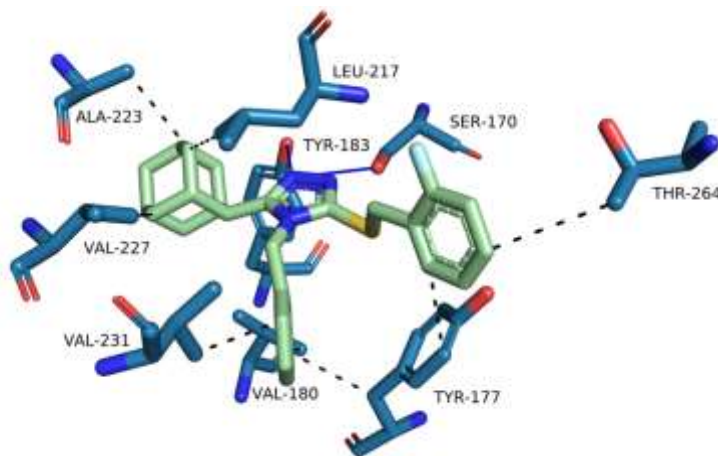

| Residue | Amino acid | Distance (Å) | Type of interaction |
|---------|------------|--------------|---------------------|
| 177A    | TYR        | 3.43         | Hydrophobic         |
| 177A    | TYR        | 3.46         | Hydrophobic         |
| 180A    | VAL        | 3.71         | Hydrophobic         |
| 183A    | TYR        | 3.99         | Hydrophobic         |
| 217A    | LEU        | 3.84         | Hydrophobic         |
| 223A    | ALA        | 3.40         | Hydrophobic         |
| 227A    | VAL        | 3.87         | Hydrophobic         |
| 231A    | VAL        | 3.30         | Hydrophobic         |
| 264A    | THR        | 3.92         | Hydrophobic         |
| 170A    | SER        | 2.93         | Hydrogen            |
| 183A    | TYR        | 3.01         | Hydrogen            |

**Table S12.** Tabulated and visual representations of binding interactions of compound **D3** within 4C7J active site using PLIP and Pymol molecular graphics system.

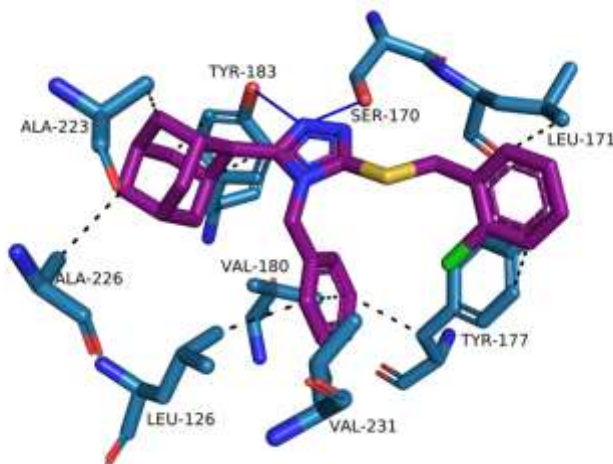

| Residue | Amino acid | Distance (Å) | Type of interaction |
|---------|------------|--------------|---------------------|
| 126A    | LEU        | 3.19         | Hydrophobic         |
| 171A    | LEU        | 3.29         | Hydrophobic         |
| 177A    | TYR        | 3.38         | Hydrophobic         |
| 177A    | TYR        | 3.47         | Hydrophobic         |
| 180A    | VAL        | 3.44         | Hydrophobic         |
| 183A    | TYR        | 3.63         | Hydrophobic         |
| 183A    | TYR        | 3.86         | Hydrophobic         |
| 223A    | ALA        | 3.74         | Hydrophobic         |
| 226A    | ALA        | 3.93         | Hydrophobic         |
| 231A    | VAL        | 3.45         | Hydrophobic         |
| 170A    | SER        | 2.54         | Hydrogen            |
| 183A    | TYR        | 2.42         | Hydrogen            |

**Table S13.** Tabulated and visual representations of binding interactions of compound **D4** within 4C7J active site using PLIP and Pymol molecular graphics system.

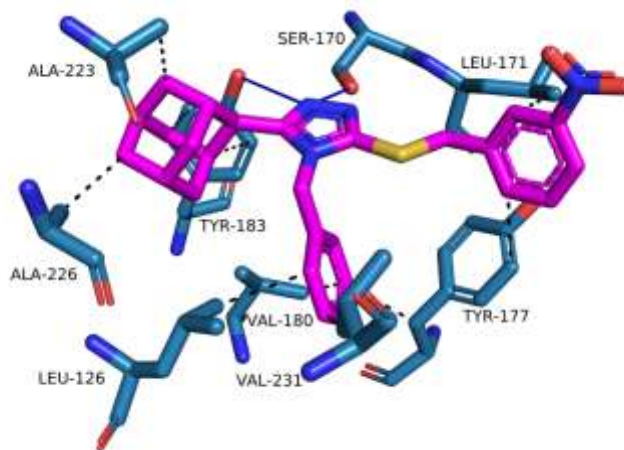

| Residue | Amino acid | Distance (Å) | Type of interaction |
|---------|------------|--------------|---------------------|
| 126A    | LEU        | 3.11         | Hydrophobic         |
| 171A    | LEU        | 3.58         | Hydrophobic         |
| 177A    | TYR        | 3.15         | Hydrophobic         |
| 177A    | TYR        | 3.44         | Hydrophobic         |
| 180A    | VAL        | 3.45         | Hydrophobic         |
| 183A    | TYR        | 3.63         | Hydrophobic         |
| 183A    | TYR        | 3.83         | Hydrophobic         |
| 223A    | ALA        | 3.71         | Hydrophobic         |
| 226A    | ALA        | 3.98         | Hydrophobic         |
| 231A    | VAL        | 3.34         | Hydrophobic         |
| 170A    | SER        | 2.45         | Hydrogen            |
| 183A    | TYR        | 2.63         | Hydrogen            |

**Table S14.** Tabulated and visual representations of binding interactions of compound **D5** within 4C7J active site using PLIP and Pymol molecular graphics system.

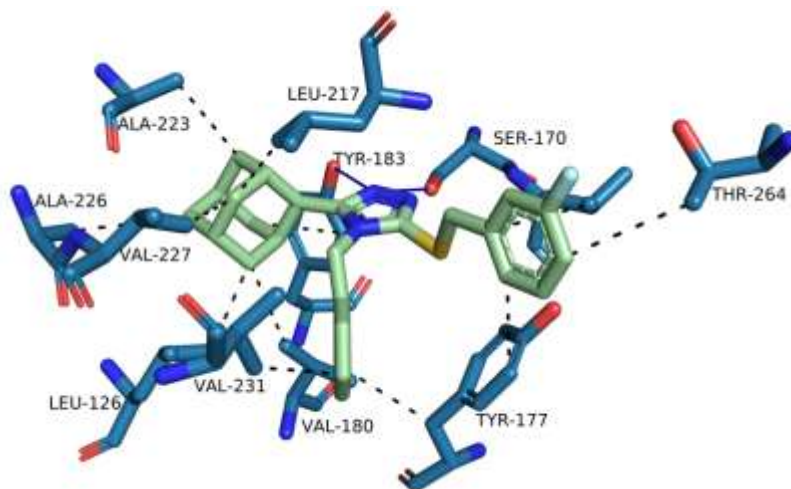

| Residue | Amino acid | Distance (Å) | Type of interaction |
|---------|------------|--------------|---------------------|
| 126A    | LEU        | 3.17         | Hydrophobic         |
| 171A    | LEU        | 3.95         | Hydrophobic         |
| 177A    | TYR        | 3.58         | Hydrophobic         |
| 177A    | TYR        | 3.56         | Hydrophobic         |
| 180A    | VAL        | 3.77         | Hydrophobic         |
| 180A    | VAL        | 3.67         | Hydrophobic         |
| 183A    | TYR        | 3.96         | Hydrophobic         |
| 217A    | LEU        | 3.40         | Hydrophobic         |
| 223A    | ALA        | 3.81         | Hydrophobic         |
| 226A    | ALA        | 3.95         | Hydrophobic         |
| 227A    | VAL        | 3.57         | Hydrophobic         |
| 231A    | VAL        | 3.34         | Hydrophobic         |
| 264A    | THR        | 3.77         | Hydrophobic         |
| 170A    | SER        | 2.34         | Hydrogen            |
| 183A    | TYR        | 3.10         | Hydrogen            |

**Table S15.** Tabulated and visual representations of binding interactions of compound **D6** within 4C7J active site using PLIP and Pymol molecular graphics system.

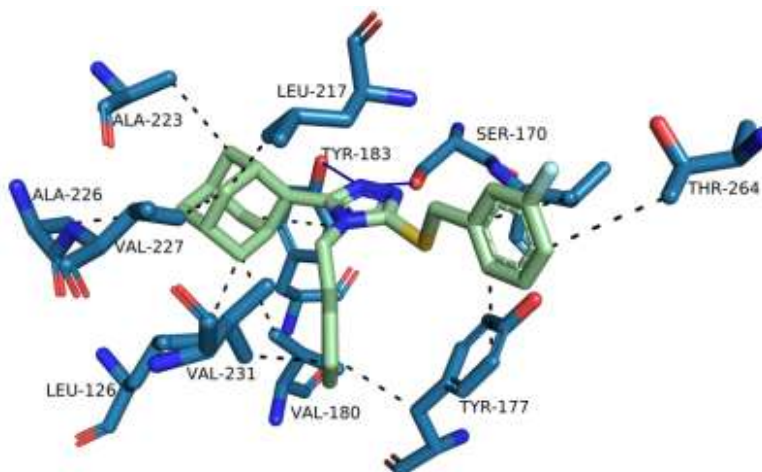

| Residue | Amino acid | Distance (Å) | Type of interaction |
|---------|------------|--------------|---------------------|
| 126A    | LEU        | 3.24         | Hydrophobic         |
| 171A    | LEU        | 3.66         | Hydrophobic         |
| 177A    | TYR        | 3.65         | Hydrophobic         |
| 177A    | TYR        | 3.44         | Hydrophobic         |
| 180A    | VAL        | 3.64         | Hydrophobic         |
| 180A    | VAL        | 3.64         | Hydrophobic         |
| 183A    | TYR        | 3.92         | Hydrophobic         |
| 217A    | LEU        | 3.74         | Hydrophobic         |
| 223A    | ALA        | 3.79         | Hydrophobic         |
| 226A    | ALA        | 3.96         | Hydrophobic         |
| 227A    | VAL        | 3.71         | Hydrophobic         |
| 231A    | VAL        | 3.26         | Hydrophobic         |
| 264A    | THR        | 3.83         | Hydrophobic         |
| 170A    | SER        | 2.52         | Hydrogen            |

**Table S16.** Tabulated and visual representations of binding interactions of compound **D7** within 4C7J active site using PLIP and Pymol molecular graphics system.

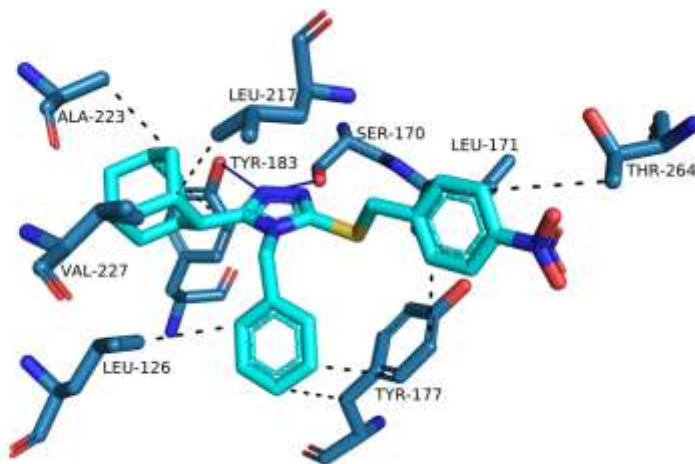

| Residue | Amino acid | Distance (Å) | Type of interaction |
|---------|------------|--------------|---------------------|
| 126A    | LEU        | 3.45         | Hydrophobic         |
| 171A    | LEU        | 3.93         | Hydrophobic         |
| 177A    | TYR        | 3.36         | Hydrophobic         |
| 177A    | TYR        | 3.60         | Hydrophobic         |
| 177A    | TYR        | 3.51         | Hydrophobic         |
| 183A    | TYR        | 3.85         | Hydrophobic         |
| 217A    | LEU        | 3.65         | Hydrophobic         |
| 223A    | ALA        | 3.62         | Hydrophobic         |
| 227A    | VAL        | 3.85         | Hydrophobic         |
| 264A    | THR        | 3.99         | Hydrophobic         |
| 170A    | SER        | 2.67         | Hydrogen            |
| 183A    | TYR        | 3.04         | Hydrogen            |

**Table S17.** Tabulated and visual representations of binding interactions of compound **D8** within 4C7J active site using PLIP and Pymol molecular graphics system.

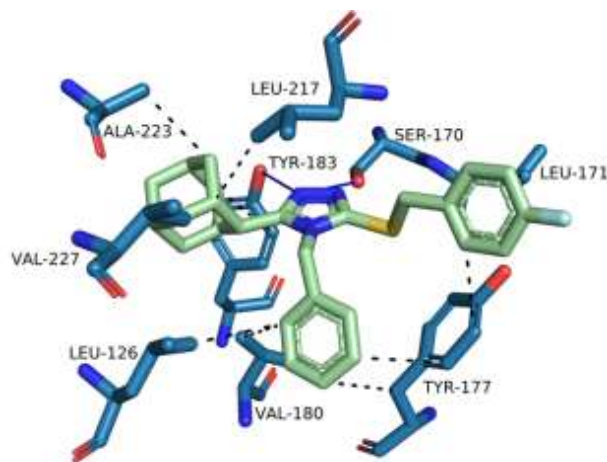

| Residue | Amino acid | Distance (Å) | Type of interaction |
|---------|------------|--------------|---------------------|
| 126A    | LEU        | 3.33         | Hydrophobic         |
| 171A    | LEU        | 3.90         | Hydrophobic         |
| 177A    | TYR        | 3.53         | Hydrophobic         |
| 177A    | TYR        | 3.67         | Hydrophobic         |
| 177A    | TYR        | 3.48         | Hydrophobic         |
| 180A    | VAL        | 3.78         | Hydrophobic         |
| 183A    | TYR        | 3.87         | Hydrophobic         |
| 217A    | LEU        | 3.74         | Hydrophobic         |
| 223A    | ALA        | 3.56         | Hydrophobic         |
| 227A    | VAL        | 3.91         | Hydrophobic         |
| 170A    | SER        | 2.72         | Hydrogen            |
| 183A    | TYR        | 2.97         | Hydrogen            |

**Table S18.** Tabulated and visual representations of binding interactions of compound **D9** within 4C7J active site using PLIP and Pymol molecular graphics system.

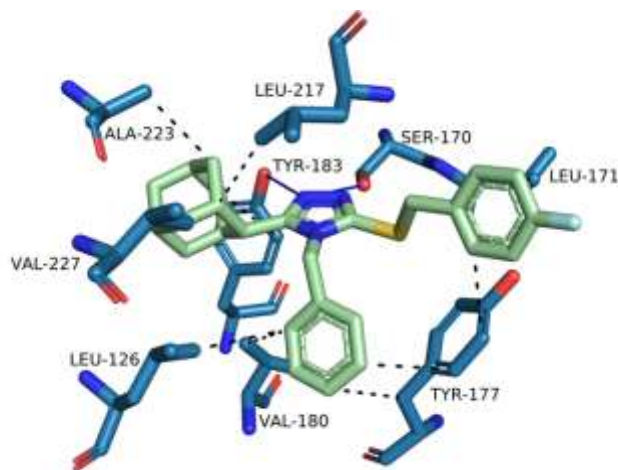

| Residue | Amino acid | Distance (Å) | Type of interaction |
|---------|------------|--------------|---------------------|
| 126A    | LEU        | 3.39         | Hydrophobic         |
| 171A    | LEU        | 3.92         | Hydrophobic         |
| 177A    | TYR        | 3.43         | Hydrophobic         |
| 177A    | TYR        | 3.62         | Hydrophobic         |
| 177A    | TYR        | 3.40         | Hydrophobic         |
| 183A    | TYR        | 3.86         | Hydrophobic         |
| 217A    | LEU        | 3.70         | Hydrophobic         |
| 223A    | ALA        | 3.57         | Hydrophobic         |
| 227A    | VAL        | 3.89         | Hydrophobic         |
| 170A    | SER        | 2.70         | Hydrogen            |
| 183A    | TYR        | 2.99         | Hydrogen            |



**Table S19.** Tabulated toxicity prediction results of compounds 1-3 and D1-9 obtained from the web-based prediction tool ProTox-II

| Toxicity and target classification | Compounds |      |      |      |      |      |      |      |      |      |      |      |
|------------------------------------|-----------|------|------|------|------|------|------|------|------|------|------|------|
|                                    | 1         | 2    | 3    | D1   | D2   | D3   | D4   | D5   | D6   | D7   | D8   | D9   |
| <b>Toxic Dose (mg/kg)</b>          | 1000      | 1000 | 1000 | 1000 | 1000 | 1000 | 1000 | 1000 | 1000 | 1000 | 1000 | 1000 |
| <b>Toxicity class</b>              | IV        | IV   | IV   | IV   | IV   | IV   | IV   | IV   | IV   | IV   | IV   | IV   |
| <b>Hepatotoxicity</b>              | Yes       | No   | No   | Yes  | No   | No   | No   | No   | No   | Yes  | No   | No   |
| <b>Carcinogenicity</b>             | Yes       | No   | No   | Yes  | No   | No   | No   | No   | No   | Yes  | No   | No   |
| <b>Immunotoxicity</b>              | No        | No   | No   | No   | No   | No   | No   | No   | No   | No   | No   | No   |
| <b>Mutagenicity</b>                | No        | No   | No   | No   | No   | No   | No   | No   | No   | No   | No   | No   |
| <b>Cytotoxicity</b>                | No        | No   | No   | No   | No   | No   | No   | No   | No   | No   | No   | No   |

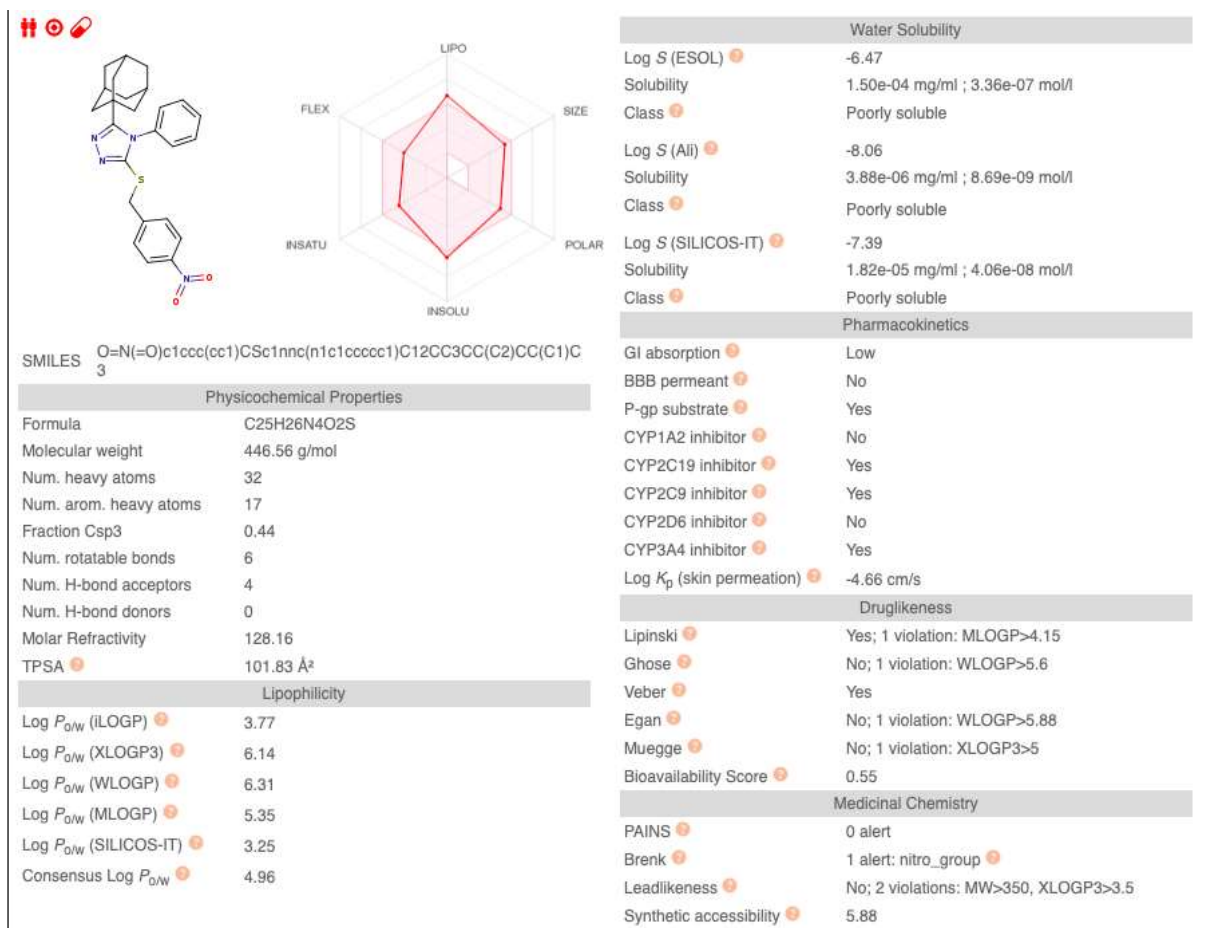

**Figure S1:** Visual representation of the predicted ADME results of compound **1** obtained from the online ADME prediction tool SwissADME.

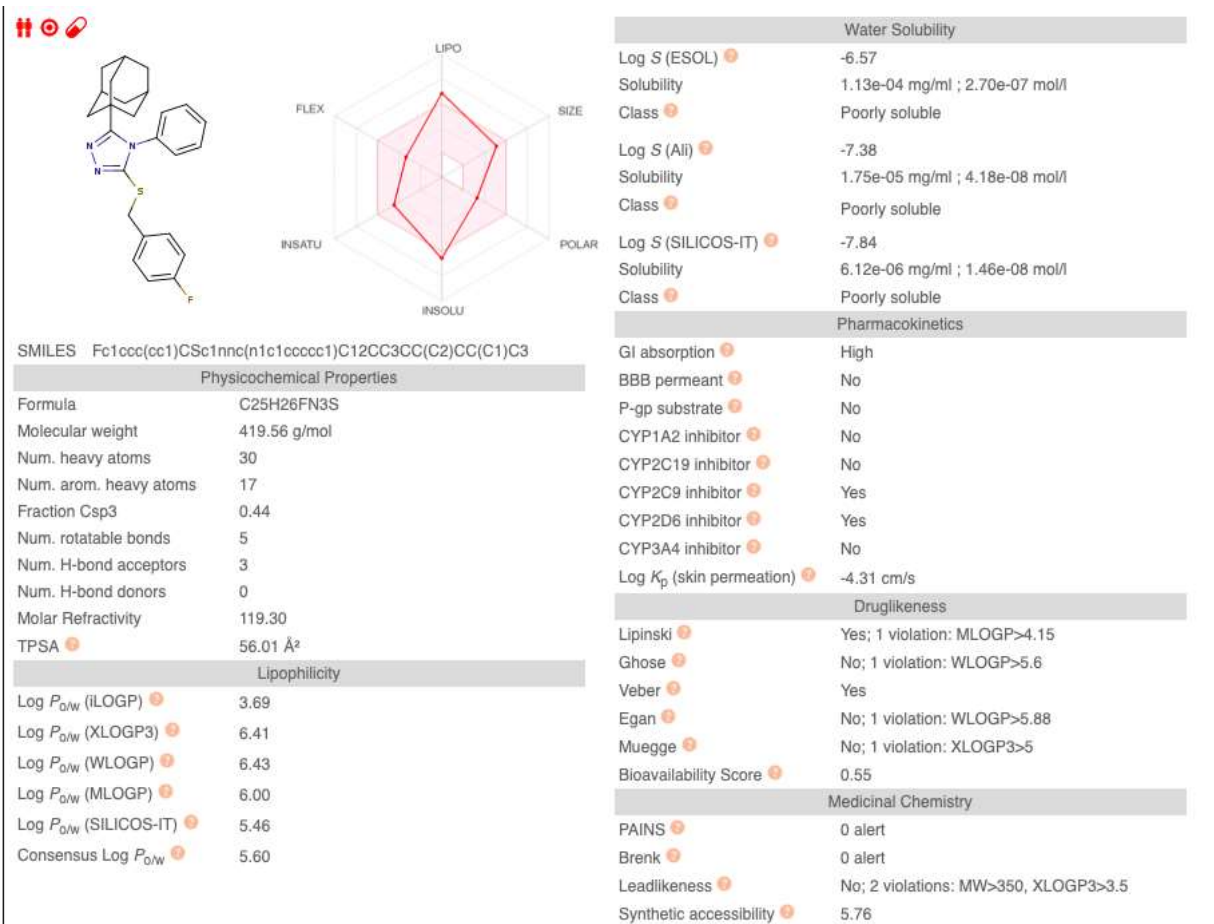

**Figure S2:** Visual representation of the predicted ADME results of compound **2** obtained from the online ADME prediction tool SwissADME.

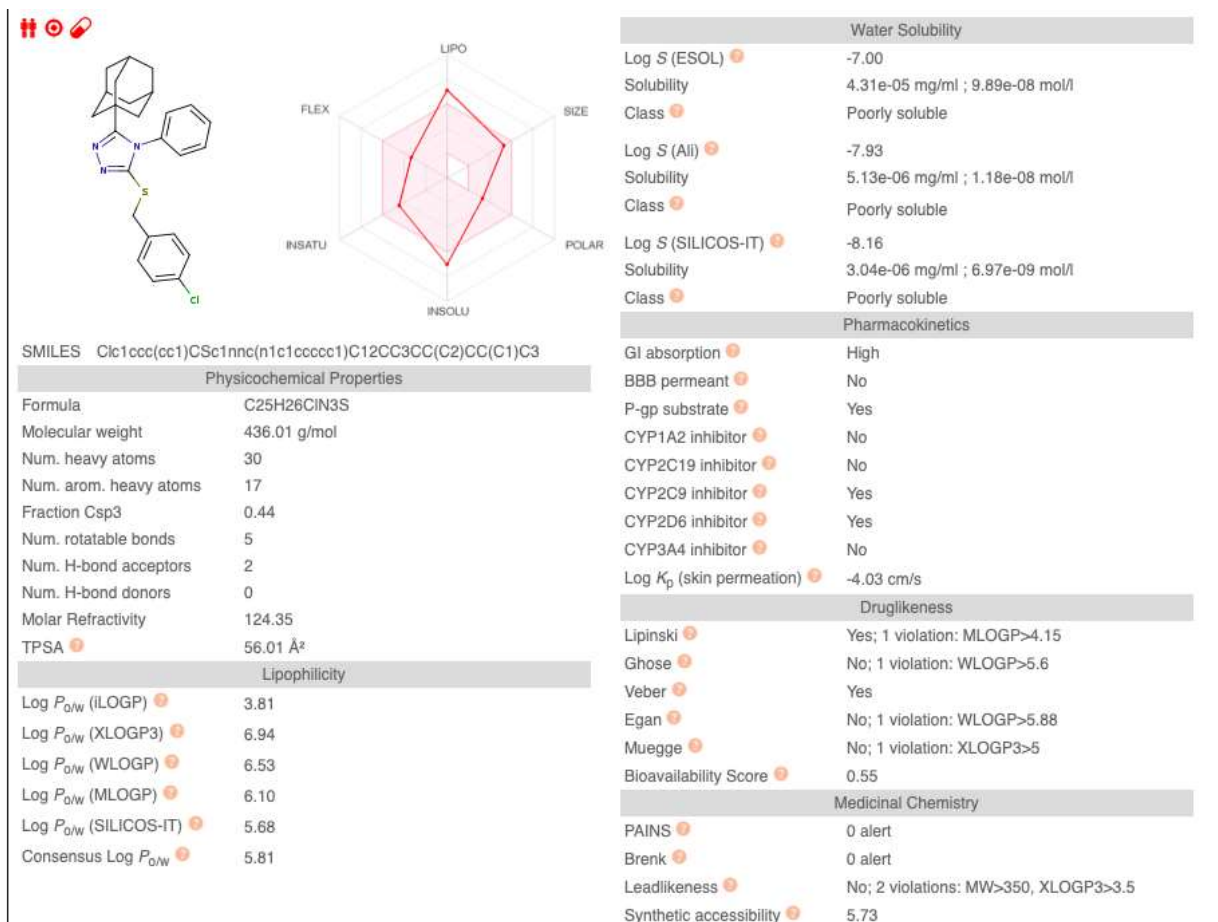

**Figure S3:** Visual representation of the predicted ADME results of compound **3** obtained from the online ADME prediction tool SwissADME.

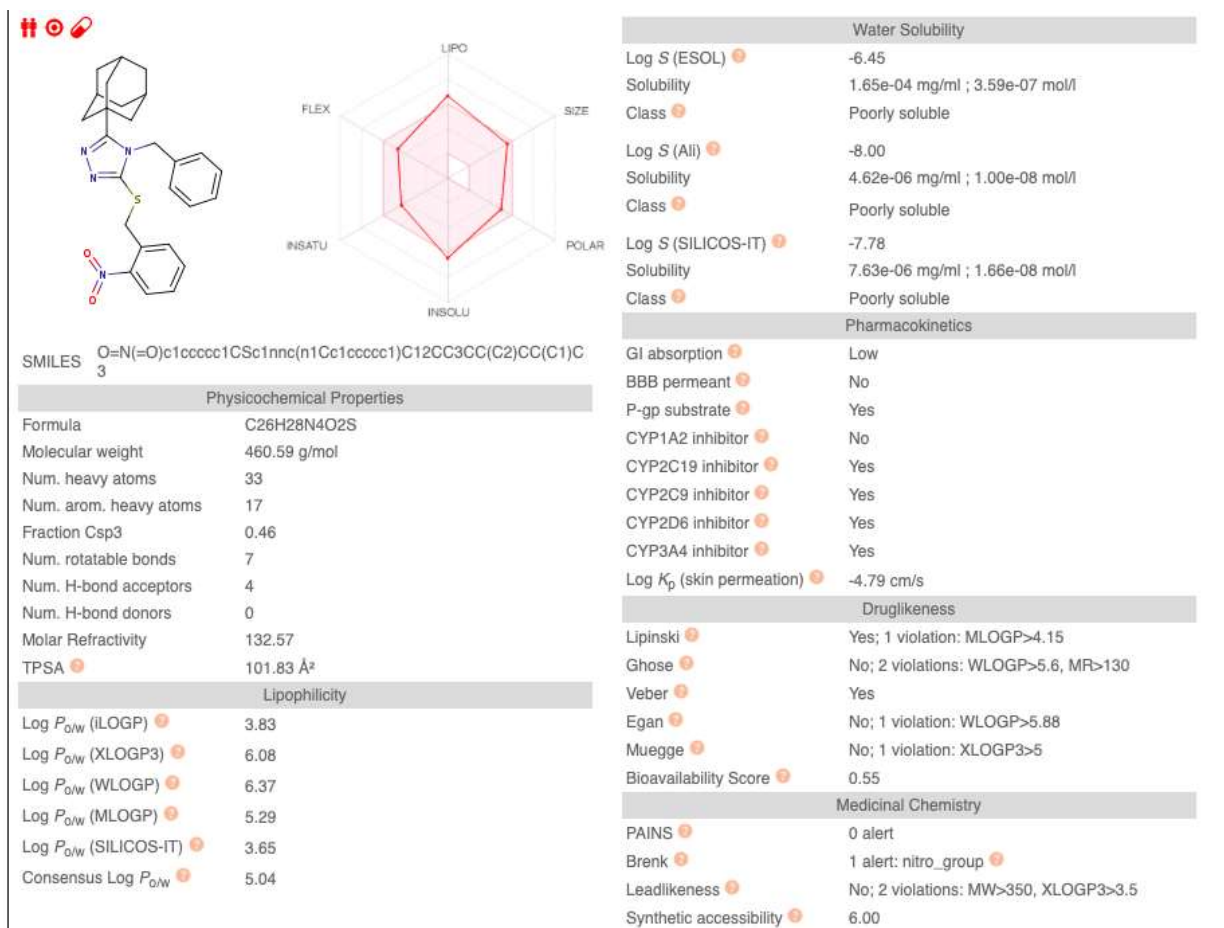

**Figure S4:** Visual representation of the predicted ADME results of compound D1 obtained from the online based ADME prediction tool SwissADME.

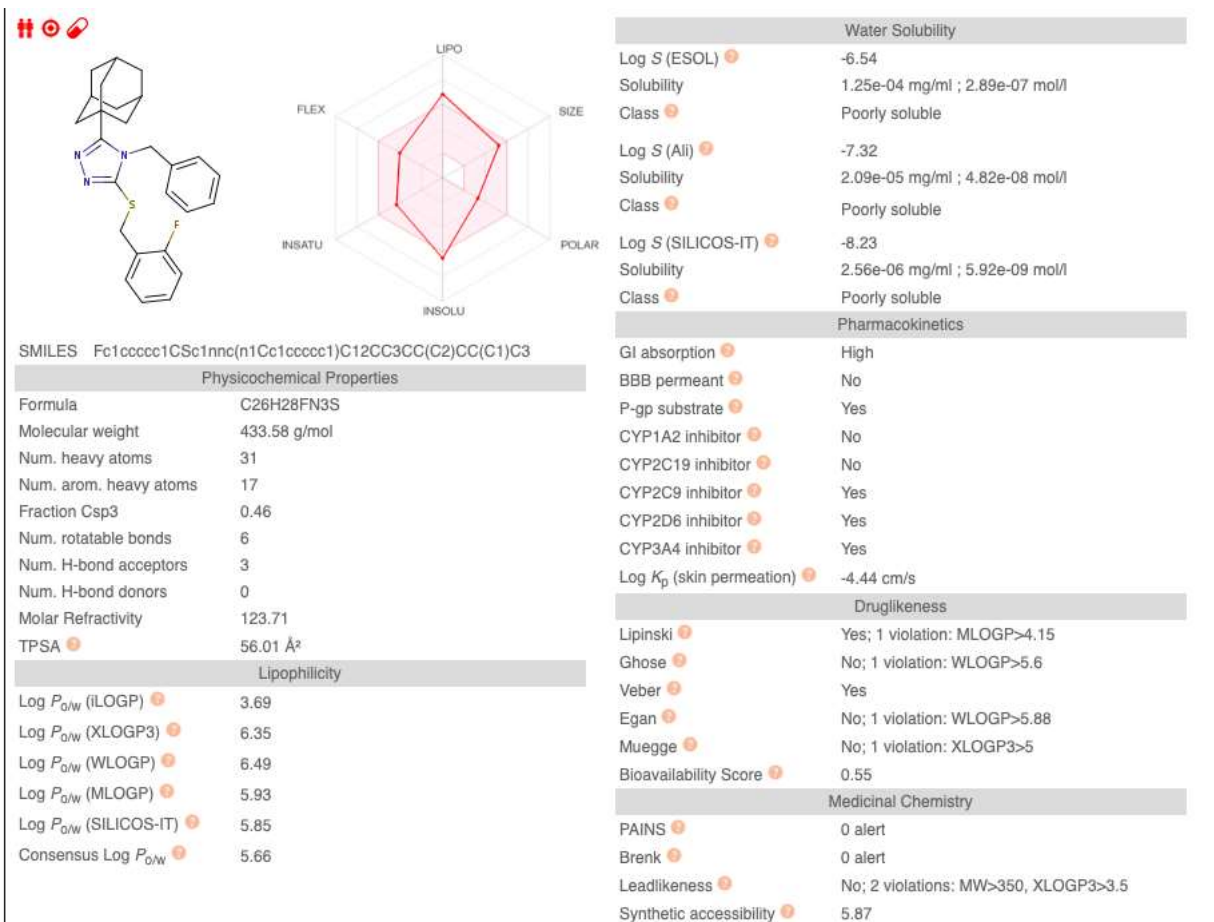

**Figure S5:** Visual representation of the predicted ADME results of compound **D2** obtained from the online ADME prediction tool SwissADME.

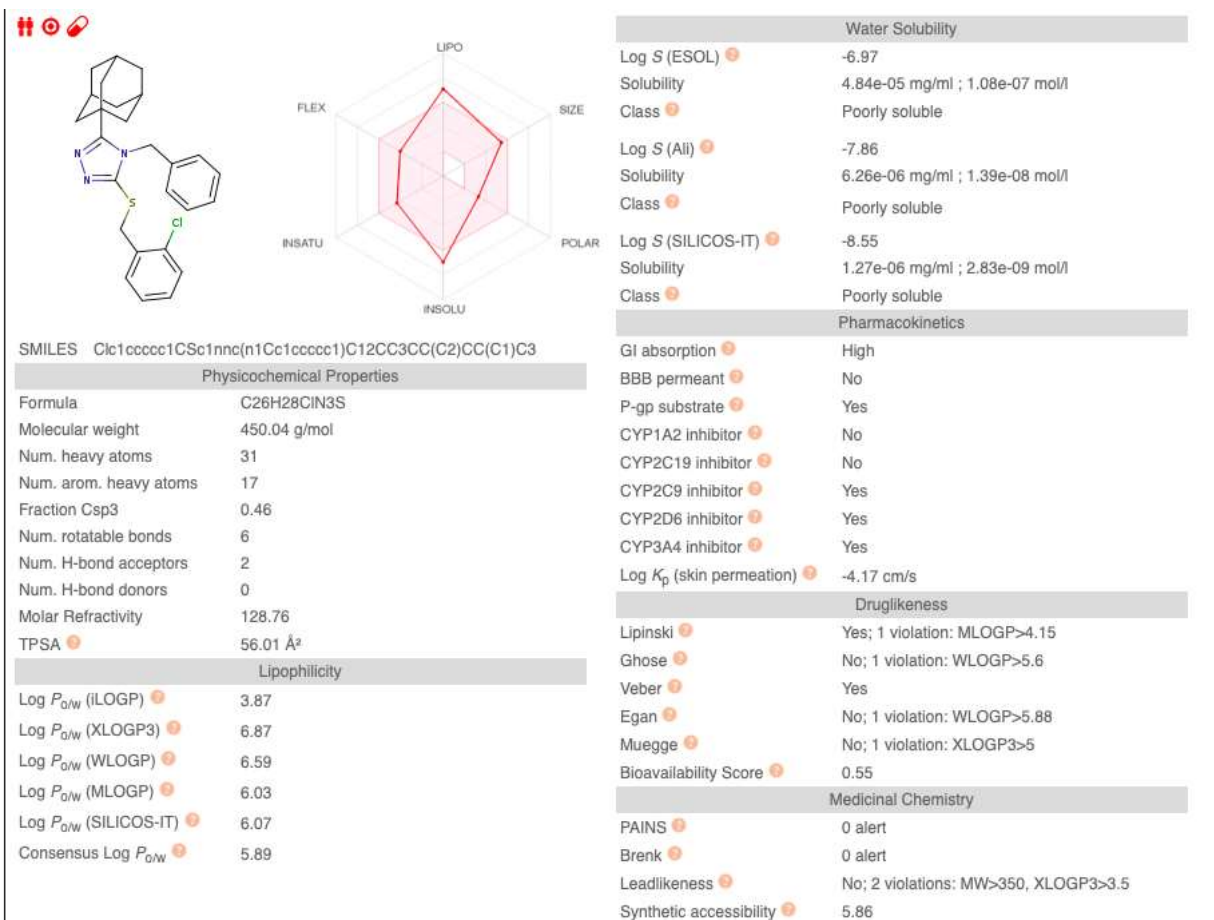

**Figure S6:** Visual representation of the predicted ADME results of compound **D3** obtained from the online ADME prediction tool SwissADME.

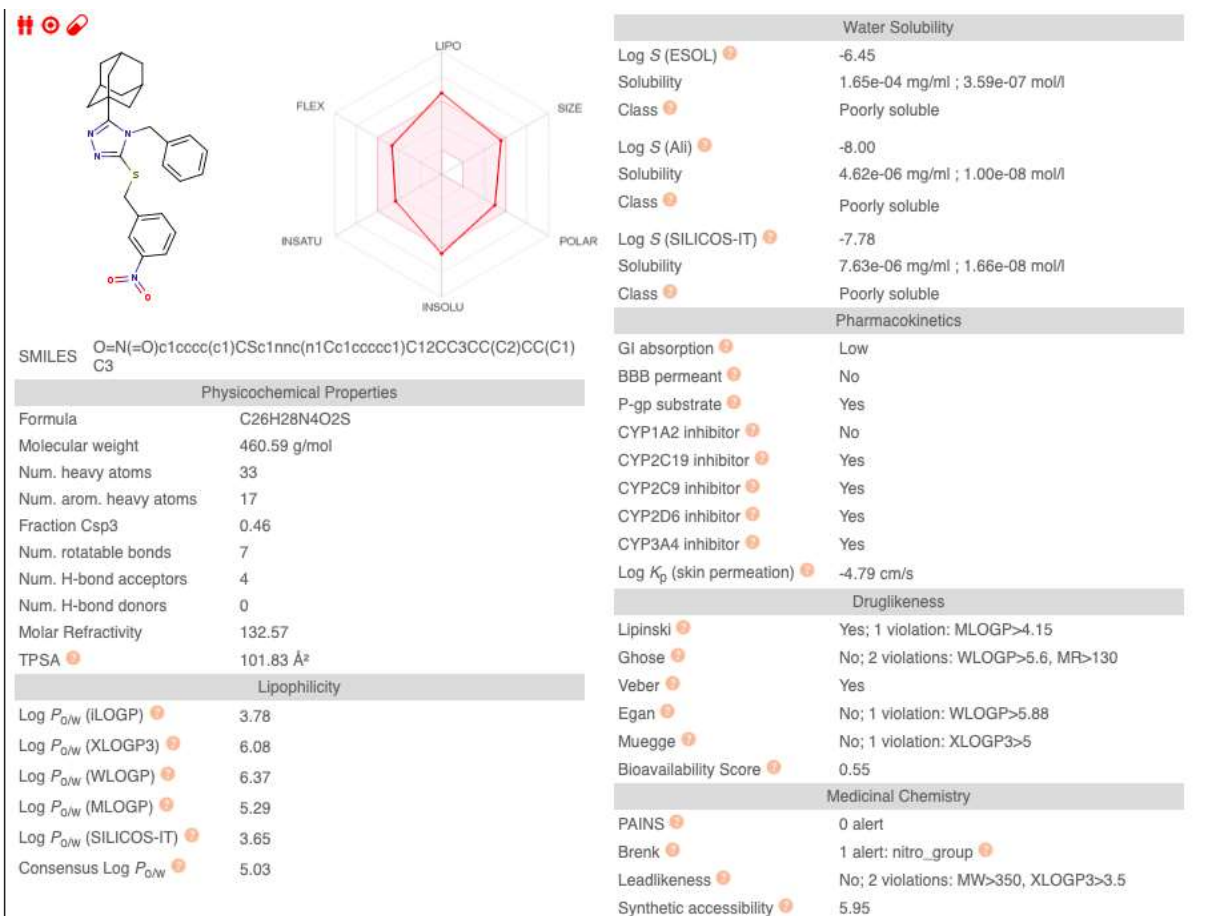

**Figure S7:** Visual representation of the predicted ADME results of compound D4 obtained from the online ADME prediction tool SwissADME.



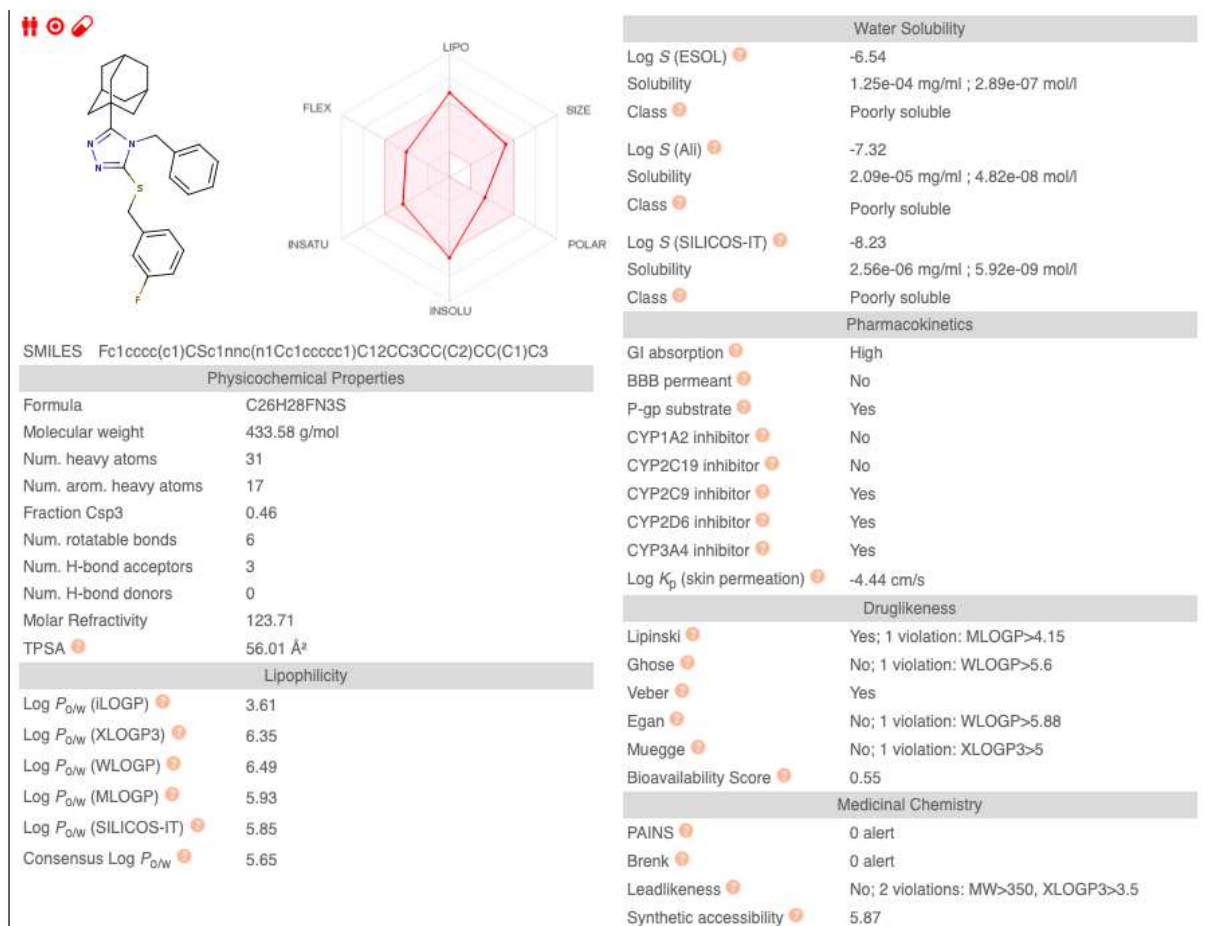

**Figure S8:** Visual representation of the predicted ADME results of compound **D5** obtained from the online ADME prediction tool SwissADME.

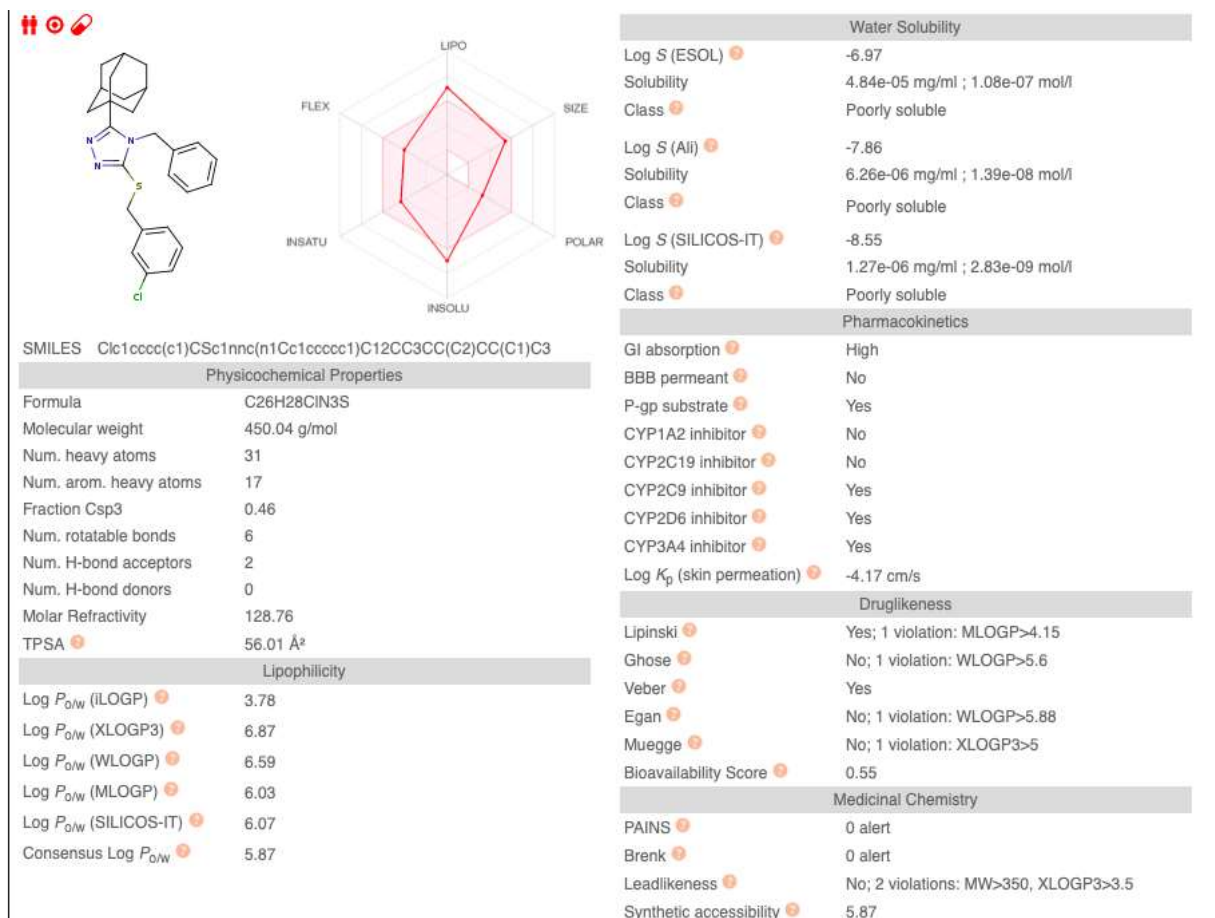

**Figure S9:** Visual representation of the predicted ADME results of compound **D6** obtained from the online ADME prediction tool SwissADME.

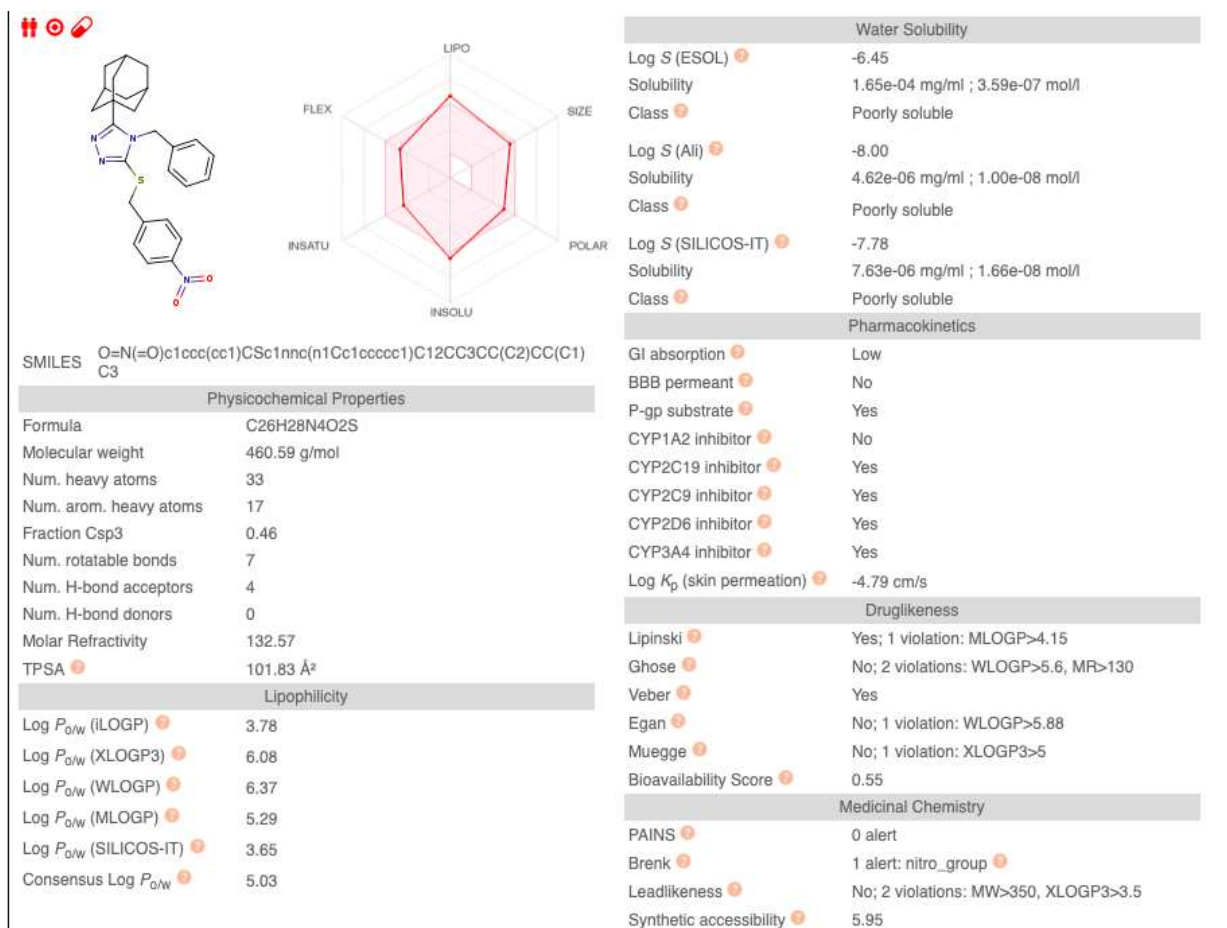

**Figure S10:** Visual representation of the predicted ADME results of compound D7 obtained from the online ADME prediction tool SwissADME.

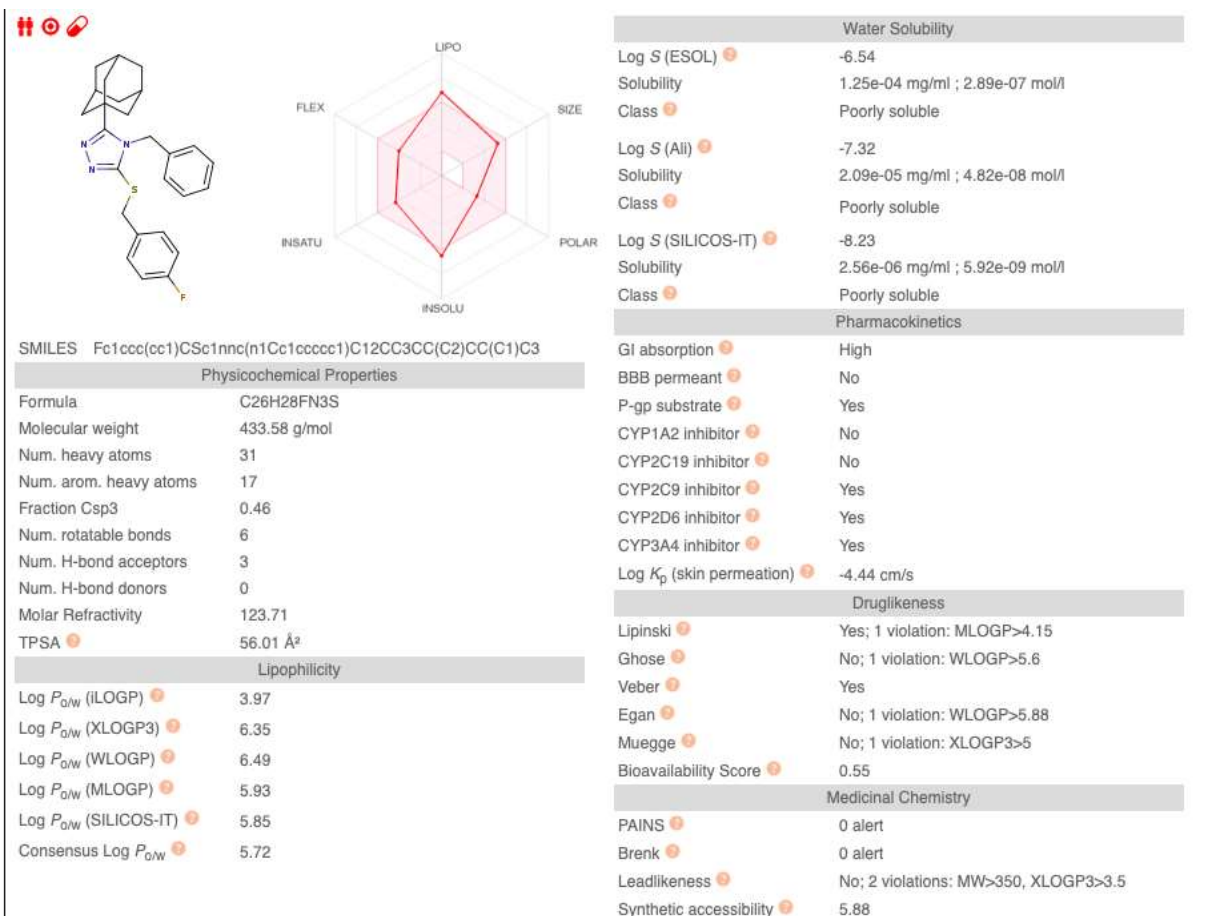

**Figure S11:** Visual representation of the predicted ADME results of compound **D8** obtained from the online ADME prediction tool SwissADME.

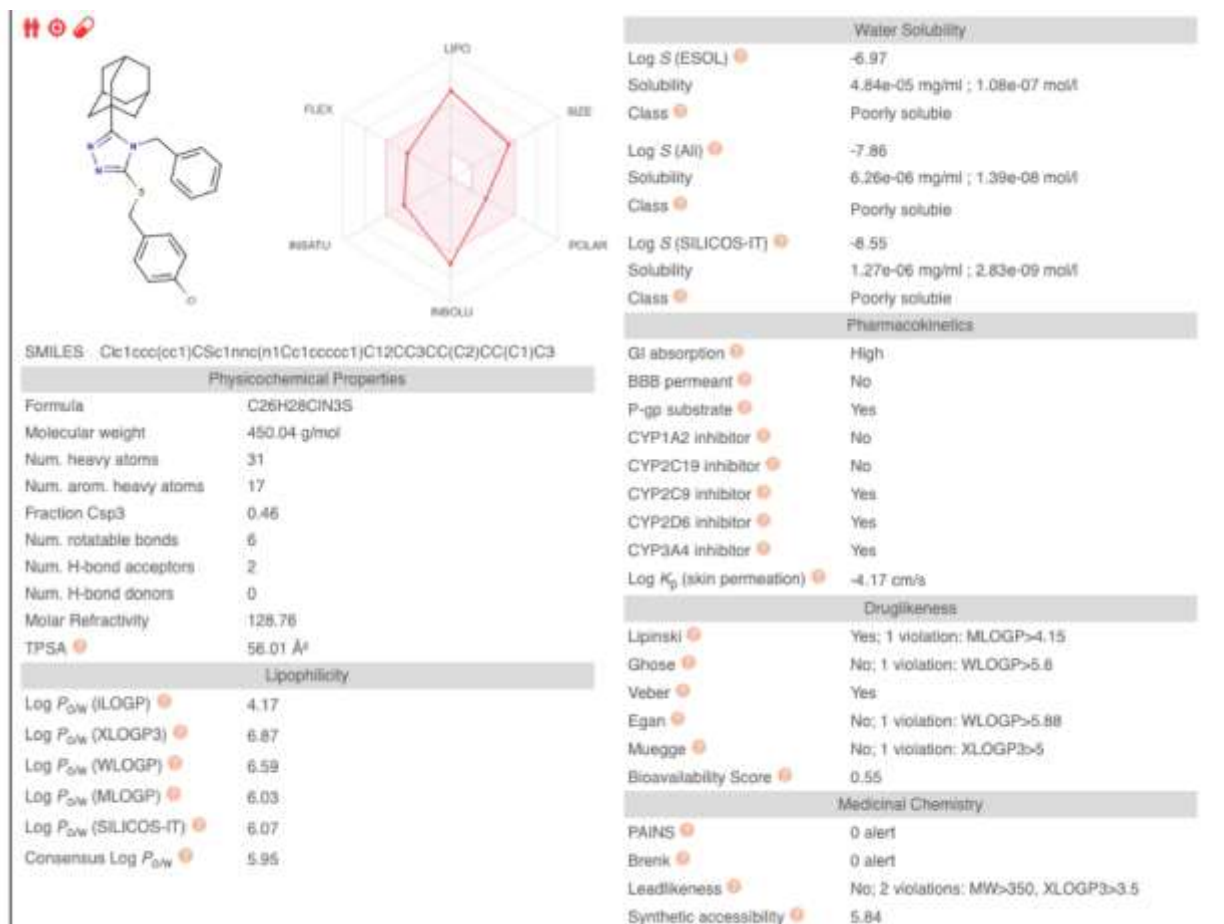

**Figure S12:** Visual representation of the predicted ADME results of compound **D9** obtained from the online ADME prediction tool SwissADME.

**Table S20.** Complete data list of PASS predictions for the activity spectrum of compound **1** (date of prediction: 2020-12-01).

| Pa    | Pi    | Activity name                                    |
|-------|-------|--------------------------------------------------|
| 0,619 | 0,002 | 11-Beta-hydroxysteroid dehydrogenase inhibitor   |
| 0,610 | 0,002 | 11-Beta-hydroxysteroid dehydrogenase 1 inhibitor |
| 0,596 | 0,009 | Atherosclerosis treatment                        |
| 0,573 | 0,026 | Antiviral (Picornavirus)                         |
| 0,531 | 0,017 | Antiobesity                                      |
| 0,510 | 0,006 | Antiparkinsonian, rigidity relieving             |
| 0,503 | 0,022 | Antiviral (Influenza)                            |
| 0,518 | 0,085 | Kidney function stimulant                        |
| 0,425 | 0,037 | Antidiabetic                                     |
| 0,399 | 0,019 | Antidiabetic (type 2)                            |
| 0,388 | 0,026 | PfA-M1 aminopeptidase inhibitor                  |
| 0,369 | 0,009 | Dual specificity phosphatase inhibitor           |
| 0,384 | 0,053 | UGT2B12 substrate                                |
| 0,342 | 0,020 | Antiviral (Influenza A)                          |
| 0,344 | 0,026 | Calpain inhibitor                                |
| 0,324 | 0,012 | Calcium channel N-type blocker                   |
| 0,289 | 0,009 | Cytidine deaminase inhibitor                     |
| 0,280 | 0,002 | 11-Beta-hydroxysteroid dehydrogenase 2 inhibitor |
| 0,335 | 0,062 | Antimycobacterial                                |
| 0,324 | 0,071 | Transcription factor STAT inhibitor              |
| 0,296 | 0,042 | Thiol protease inhibitor                         |
| 0,347 | 0,097 | Alcohol O-acetyltransferase inhibitor            |
| 0,334 | 0,085 | HMGCS2 expression enhancer                       |
| 0,309 | 0,062 | Transcription factor STAT3 inhibitor             |
| 0,320 | 0,074 | Antiviral (Adenovirus)                           |
| 0,309 | 0,065 | Antituberculosic                                 |
| 0,266 | 0,029 | Antidepressant, Imipramin-like                   |
| 0,327 | 0,104 | Polarisation stimulant                           |
| 0,390 | 0,168 | Fusarinine-C ornithinesterase inhibitor          |
| 0,238 | 0,022 | GST M1-1 substrate                               |
| 0,214 | 0,005 | Antiacromegalic                                  |
| 0,246 | 0,037 | Mcl-1 antagonist                                 |
| 0,304 | 0,103 | Prion diseases treatment                         |
| 0,242 | 0,043 | Mucorpepsin inhibitor                            |
| 0,312 | 0,115 | CDK9/cyclin T1 inhibitor                         |
| 0,259 | 0,064 | GST P substrate                                  |
| 0,269 | 0,095 | Prostate disorders treatment                     |
| 0,236 | 0,062 | GST P1-1 substrate                               |
| 0,301 | 0,132 | EIF4E expression inhibitor                       |
| 0,174 | 0,010 | Ca(v)2.2 blocker                                 |
| 0,186 | 0,022 | Beta lactamase inhibitor                         |
| 0,210 | 0,050 | GABA B receptor agonist                          |

|       |       |                                                       |
|-------|-------|-------------------------------------------------------|
| 0,231 | 0,083 | Gestagen antagonist                                   |
| 0,348 | 0,200 | Chymosin inhibitor                                    |
| 0,348 | 0,200 | Acrocyllindropepsin inhibitor                         |
| 0,348 | 0,200 | Saccharopepsin inhibitor                              |
| 0,188 | 0,044 | Calcium channel blocker                               |
| 0,177 | 0,034 | HCV NS3-helicase inhibitor                            |
| 0,236 | 0,100 | Aldosterone antagonist                                |
| 0,211 | 0,081 | Oryzin inhibitor                                      |
| 0,176 | 0,047 | Antischistosomal                                      |
| 0,253 | 0,125 | Neuropeptide Y2 antagonist                            |
| 0,251 | 0,126 | L-glutamate oxidase inhibitor                         |
| 0,176 | 0,052 | DNA directed RNA polymerase inhibitor                 |
| 0,286 | 0,165 | RNA-directed RNA polymerase inhibitor                 |
| 0,125 | 0,004 | CDC25B inhibitor                                      |
| 0,171 | 0,056 | Alkaline phosphatase inhibitor                        |
| 0,188 | 0,078 | Tropinesterase inhibitor                              |
| 0,183 | 0,074 | Dual specificity phosphatase 1 inhibitor              |
| 0,118 | 0,010 | Estradiol 17 beta dehydrogenase 2 inhibitor           |
| 0,301 | 0,200 | Phospholipid-translocating ATPase inhibitor           |
| 0,112 | 0,014 | Antiprotozoal (Histomonas)                            |
| 0,194 | 0,096 | Stroke treatment                                      |
| 0,216 | 0,119 | ATP phosphoribosyltransferase inhibitor               |
| 0,312 | 0,218 | 5-O-(4-coumaroyl)-D-quinic 3'-monooxygenase inhibitor |
| 0,269 | 0,178 | (R)-6-hydroxynicotine oxidase inhibitor               |
| 0,202 | 0,116 | Antibacterial                                         |
| 0,210 | 0,126 | 5 Hydroxytryptamine 1E antagonist                     |
| 0,173 | 0,089 | Antiparkinsonian, tremor relieving                    |
| 0,203 | 0,119 | Transcription factor inhibitor                        |
| 0,207 | 0,124 | Gamma-glutamyltransferase inhibitor                   |
| 0,178 | 0,098 | Cutinase inhibitor                                    |
| 0,295 | 0,216 | Neurotransmitter uptake inhibitor                     |
| 0,159 | 0,081 | Paraoxonase substrate                                 |
| 0,115 | 0,039 | Transglutaminase 2 inhibitor                          |
| 0,322 | 0,247 | Ubiquinol-cytochrome-c reductase inhibitor            |
| 0,284 | 0,209 | Apyrase inhibitor                                     |
| 0,220 | 0,146 | Cardiotonic                                           |
| 0,160 | 0,088 | Acaricide                                             |
| 0,181 | 0,110 | Carnitinamidase inhibitor                             |
| 0,149 | 0,077 | Thioredoxin reductase inhibitor                       |
| 0,145 | 0,074 | Hexokinase inhibitor                                  |
| 0,088 | 0,017 | Protein-tyrosine phosphatase 2C inhibitor             |
| 0,207 | 0,136 | ATPase stimulant                                      |
| 0,251 | 0,188 | Thymidylate 5'-phosphatase inhibitor                  |
| 0,261 | 0,199 | Glucan endo-1,3-beta-D-glucosidase inhibitor          |
| 0,249 | 0,188 | Muscular dystrophy treatment                          |
| 0,200 | 0,140 | Chloride channel activator                            |



|       |       |                                                         |
|-------|-------|---------------------------------------------------------|
| 0,246 | 0,186 | Benzoate-CoA ligase inhibitor                           |
| 0,273 | 0,215 | Phosphatidylcholine-retinol O-acyltransferase inhibitor |
| 0,210 | 0,151 | Plastoquinol-plastocyanin reductase inhibitor           |
| 0,197 | 0,140 | CYP2C9 inhibitor                                        |
| 0,189 | 0,137 | Lactose synthase inhibitor                              |
| 0,169 | 0,117 | Hyponitrite reductase inhibitor                         |
| 0,209 | 0,157 | Urethanase inhibitor                                    |
| 0,055 | 0,005 | Equilibrative nucleoside transport protein 1 inhibitor  |
| 0,149 | 0,099 | Inorganic diphosphatase inhibitor                       |
| 0,194 | 0,144 | CYP2B11 substrate                                       |
| 0,244 | 0,194 | Insulysin inhibitor                                     |
| 0,179 | 0,130 | Prolyl aminopeptidase inhibitor                         |
| 0,125 | 0,079 | Tardive dyskinesia treatment                            |
| 0,080 | 0,038 | Dysmenorrhea treatment                                  |
| 0,098 | 0,059 | CDC25A inhibitor                                        |
| 0,087 | 0,050 | Xanthine oxidase substrate                              |
| 0,112 | 0,077 | Somatostatin 2 agonist                                  |
| 0,124 | 0,090 | Nicotinic alpha6 receptor agonist                       |
| 0,109 | 0,075 | Calcium channel (voltage-sensitive) blocker             |
| 0,181 | 0,149 | Channel-conductance-controlling ATPase inhibitor        |
| 0,232 | 0,201 | S-formylglutathione hydrolase inhibitor                 |
| 0,126 | 0,095 | GST T1-1 substrate                                      |
| 0,126 | 0,095 | GST T substrate                                         |
| 0,037 | 0,006 | Equilibrative nucleoside transport protein inhibitor    |
| 0,215 | 0,185 | Lipoprotein lipase inhibitor                            |
| 0,159 | 0,129 | Polarisation inhibitor                                  |
| 0,266 | 0,236 | Neurotransmitter antagonist                             |
| 0,154 | 0,127 | Antirickettsial                                         |
| 0,185 | 0,159 | Antineoplastic (brain cancer)                           |
| 0,297 | 0,273 | Polyporopepsin inhibitor                                |
| 0,201 | 0,177 | Focal adhesion kinase 2 inhibitor                       |
| 0,039 | 0,015 | Methionyl aminopeptidase 2 inhibitor                    |
| 0,044 | 0,022 | Acetyl-CoA transferase 2 inhibitor                      |
| 0,185 | 0,167 | Pyruvate decarboxylase inhibitor                        |
| 0,228 | 0,212 | Cyclohexanone monooxygenase inhibitor                   |
| 0,035 | 0,020 | Sodium/glucose cotransporter 1 inhibitor                |
| 0,043 | 0,029 | CXC chemokine 2 receptor antagonist                     |
| 0,024 | 0,013 | Antibiotic Oxacephem-like                               |
| 0,215 | 0,205 | Uterine relaxant                                        |
| 0,048 | 0,039 | Purinergic P2Y agonist                                  |
| 0,048 | 0,040 | Cyclin-dependent kinase 5 inhibitor                     |
| 0,095 | 0,090 | Alpha-pinene-oxide decyclase inhibitor                  |
| 0,078 | 0,072 | D-Ala-D-Ala ligase inhibitor                            |
| 0,084 | 0,080 | Thermomycolin inhibitor                                 |
| 0,159 | 0,157 | Glucan 1,4-alpha-maltotetraohydrolase inhibitor         |
| 0,227 | 0,226 | N-hydroxyarylamine O-acetyltransferase inhibitor        |



**Table S21.** Complete raw data list of PASS predictions for the activity spectrum of compound **2** (date of prediction: 2020-12-01).

| Pa    | Pi    | Activity name                                              |
|-------|-------|------------------------------------------------------------|
| 0,738 | 0,005 | Antiobesity                                                |
| 0,687 | 0,005 | Atherosclerosis treatment                                  |
| 0,673 | 0,002 | 11-Beta-hydroxysteroid dehydrogenase inhibitor             |
| 0,665 | 0,002 | 11-Beta-hydroxysteroid dehydrogenase 1 inhibitor           |
| 0,563 | 0,016 | Antidiabetic                                               |
| 0,488 | 0,011 | Antidiabetic (type 2)                                      |
| 0,515 | 0,088 | Kidney function stimulant                                  |
| 0,405 | 0,020 | Antiparkinsonian, rigidity relieving                       |
| 0,378 | 0,009 | Calcium channel N-type blocker                             |
| 0,341 | 0,012 | Dual specificity phosphatase inhibitor                     |
| 0,321 | 0,005 | Ca(v)2.2 blocker                                           |
| 0,304 | 0,002 | 11-Beta-hydroxysteroid dehydrogenase 2 inhibitor           |
| 0,304 | 0,048 | PfA-M1 aminopeptidase inhibitor                            |
| 0,296 | 0,044 | Antiviral (Influenza A)                                    |
| 0,311 | 0,066 | Neuropeptide Y2 antagonist                                 |
| 0,267 | 0,052 | Thiol protease inhibitor                                   |
| 0,340 | 0,128 | Diabetic neuropathy treatment                              |
| 0,291 | 0,079 | Prostate disorders treatment                               |
| 0,294 | 0,083 | Transcription factor STAT inhibitor                        |
| 0,299 | 0,090 | Antiviral (Influenza)                                      |
| 0,231 | 0,035 | GABA B receptor agonist                                    |
| 0,256 | 0,067 | Calpain inhibitor                                          |
| 0,193 | 0,007 | Antiacromegalic                                            |
| 0,258 | 0,081 | CYP2C9 inhibitor                                           |
| 0,213 | 0,042 | Dual specificity phosphatase 1 inhibitor                   |
| 0,323 | 0,153 | Phosphatidylcholine-retinol O-acyltransferase inhibitor    |
| 0,339 | 0,172 | Antiviral (Picornavirus)                                   |
| 0,343 | 0,189 | 5-O-(4-coumaroyl)-D-quinic acid 3'-monooxygenase inhibitor |
| 0,180 | 0,029 | Cytidine deaminase inhibitor                               |
| 0,233 | 0,085 | CYP3A4 inhibitor                                           |
| 0,205 | 0,057 | Antidepressant, Imipramin-like                             |
| 0,167 | 0,023 | Narcolepsy treatment                                       |
| 0,246 | 0,107 | Retinoprotector                                            |
| 0,138 | 0,007 | Estradiol 17 beta dehydrogenase 2 inhibitor                |
| 0,190 | 0,068 | Menstruation disorders treatment                           |
| 0,256 | 0,133 | Analgesic, non-opioid                                      |
| 0,151 | 0,029 | Tardive dyskinesia treatment                               |
| 0,174 | 0,054 | DNA directed RNA polymerase inhibitor                      |
| 0,122 | 0,004 | CDC25B inhibitor                                           |
| 0,196 | 0,081 | Gastric antisecretory                                      |
| 0,248 | 0,136 | Serum-glucocorticoid regulated kinase 1 inhibitor          |
| 0,307 | 0,201 | Neurotransmitter uptake inhibitor                          |

|       |       |                                                                                                 |
|-------|-------|-------------------------------------------------------------------------------------------------|
| 0,213 | 0,109 | Transcription factor inhibitor                                                                  |
| 0,276 | 0,173 | Insulin promoter                                                                                |
| 0,140 | 0,048 | HCV NS3-helicase inhibitor                                                                      |
| 0,148 | 0,057 | Nicotinic alpha6 receptor agonist                                                               |
| 0,271 | 0,186 | Dementia treatment                                                                              |
| 0,150 | 0,068 | Alkaline phosphatase inhibitor                                                                  |
| 0,115 | 0,037 | CDC25A inhibitor                                                                                |
| 0,190 | 0,114 | Tankyrase inhibitor                                                                             |
| 0,234 | 0,159 | Antiviral (Adenovirus)                                                                          |
| 0,131 | 0,057 | Beta lactamase inhibitor                                                                        |
| 0,202 | 0,129 | Transcription factor STAT3 inhibitor                                                            |
| 0,089 | 0,017 | Protein-tyrosine phosphatase 2C inhibitor                                                       |
| 0,156 | 0,088 | Niemann-Pick C1-like 1 protein antagonist                                                       |
| 0,092 | 0,024 | Dysmenorrhea treatment                                                                          |
| 0,252 | 0,185 | Insulysin inhibitor                                                                             |
| 0,143 | 0,076 | Hexokinase inhibitor                                                                            |
| 0,301 | 0,245 | Antineurotic                                                                                    |
| 0,191 | 0,139 | Arylmalonate decarboxylase inhibitor                                                            |
| 0,117 | 0,069 | Somatostatin 2 agonist                                                                          |
| 0,054 | 0,007 | Acetyl-CoA transferase 2 inhibitor                                                              |
| 0,101 | 0,055 | Nicotinic alpha2beta4 receptor agonist                                                          |
| 0,179 | 0,134 | Glucan 1,4-alpha-maltotetraohydrolase inhibitor                                                 |
| 0,149 | 0,110 | GST M1-1 substrate                                                                              |
| 0,045 | 0,009 | Methionyl aminopeptidase 2 inhibitor                                                            |
| 0,157 | 0,122 | GABA receptor agonist                                                                           |
| 0,203 | 0,169 | Hypolipemic                                                                                     |
| 0,203 | 0,172 | All-trans-retinyl-palmitate hydrolase inhibitor                                                 |
| 0,186 | 0,158 | Albendazole monooxygenase inhibitor                                                             |
| 0,039 | 0,013 | Equilibrative nucleoside transport protein 1 inhibitor                                          |
| 0,051 | 0,024 | Phospholipase A2 IIa inhibitor                                                                  |
| 0,186 | 0,161 | N-formylmethionyl-peptidase inhibitor                                                           |
| 0,250 | 0,226 | Acetylgalactosaminyl-O-glycosyl-glycoprotein beta-1,3-N-acetylglucosaminyltransferase inhibitor |
| 0,197 | 0,174 | Cardiotonic                                                                                     |
| 0,084 | 0,061 | TRKA antagonist                                                                                 |
| 0,037 | 0,016 | Sodium/glucose cotransporter 1 inhibitor                                                        |
| 0,214 | 0,195 | Alkenylglycerophosphocholine hydrolase inhibitor                                                |
| 0,028 | 0,010 | Antibiotic Oxacephem-like                                                                       |
| 0,054 | 0,039 | Estradiol 17 beta dehydrogenase inhibitor                                                       |
| 0,043 | 0,028 | CXC chemokine 2 receptor antagonist                                                             |
| 0,080 | 0,065 | Tyrosine-protein kinase receptor antagonist                                                     |
| 0,050 | 0,037 | Purinergic P2Y agonist                                                                          |
| 0,046 | 0,037 | Secretory phospholipase A2 inhibitor                                                            |
| 0,025 | 0,016 | Acetyl-CoA transferase 1 inhibitor                                                              |
| 0,027 | 0,018 | Equilibrative nucleoside transport protein inhibitor                                            |
| 0,152 | 0,144 | Lipocortins synthesis antagonist                                                                |

|       |       |                  |
|-------|-------|------------------|
| 0,182 | 0,175 | CYP2C3 substrate |
|-------|-------|------------------|

**Table S22.** Complete list of PASS predictions for the activity spectrum of compound **3** (date of prediction: 2020-12-01).

| Pa    | Pi    | Activity name                                         |
|-------|-------|-------------------------------------------------------|
| 0,783 | 0,005 | Antiobesity                                           |
| 0,676 | 0,002 | 11-Beta-hydroxysteroid dehydrogenase inhibitor        |
| 0,667 | 0,002 | 11-Beta-hydroxysteroid dehydrogenase 1 inhibitor      |
| 0,665 | 0,005 | Atherosclerosis treatment                             |
| 0,616 | 0,043 | 5-O-(4-coumaroyl)-D-quinat 3'-monooxygenase inhibitor |
| 0,566 | 0,015 | Antidiabetic                                          |
| 0,504 | 0,006 | Antiparkinsonian, rigidity relieving                  |
| 0,482 | 0,011 | Antidiabetic (type 2)                                 |
| 0,488 | 0,056 | Antiviral (Picornavirus)                              |
| 0,515 | 0,088 | Kidney function stimulant                             |
| 0,471 | 0,060 | Insulysin inhibitor                                   |
| 0,416 | 0,027 | Neuropeptide Y2 antagonist                            |
| 0,359 | 0,010 | Dual specificity phosphatase inhibitor                |
| 0,338 | 0,005 | GABA B receptor agonist                               |
| 0,329 | 0,001 | 11-Beta-hydroxysteroid dehydrogenase 2 inhibitor      |
| 0,389 | 0,069 | Insulin promoter                                      |
| 0,330 | 0,012 | Calcium channel N-type blocker                        |
| 0,381 | 0,063 | Diabetic neuropathy treatment                         |
| 0,344 | 0,036 | PfA-M1 aminopeptidase inhibitor                       |
| 0,322 | 0,036 | Thiol protease inhibitor                              |
| 0,349 | 0,064 | Antiviral (Influenza)                                 |
| 0,271 | 0,005 | Ca(v)2.2 blocker                                      |
| 0,284 | 0,023 | Antidepressant, Imipramin-like                        |
| 0,300 | 0,041 | Antiviral (Influenza A)                               |
| 0,287 | 0,049 | Calpain inhibitor                                     |
| 0,300 | 0,080 | Transcription factor STAT inhibitor                   |
| 0,291 | 0,072 | Transcription factor STAT3 inhibitor                  |
| 0,275 | 0,069 | CYP2C9 inhibitor                                      |
| 0,203 | 0,005 | Antiacromegalic                                       |
| 0,224 | 0,034 | Dual specificity phosphatase 1 inhibitor              |
| 0,209 | 0,021 | Cytidine deaminase inhibitor                          |
| 0,414 | 0,227 | Phobic disorders treatment                            |
| 0,387 | 0,204 | Phosphatase inhibitor                                 |
| 0,272 | 0,093 | Prostate disorders treatment                          |
| 0,218 | 0,040 | Menstruation disorders treatment                      |
| 0,292 | 0,127 | Antiseborrheic                                        |
| 0,241 | 0,078 | CYP2C3 substrate                                      |
| 0,279 | 0,119 | CYP2A8 substrate                                      |
| 0,198 | 0,038 | DNA directed RNA polymerase inhibitor                 |

|       |       |                                                         |
|-------|-------|---------------------------------------------------------|
| 0,238 | 0,079 | CYP3A4 inhibitor                                        |
| 0,326 | 0,181 | 27-Hydroxycholesterol 7alpha-monooxygenase inhibitor    |
| 0,177 | 0,034 | HCV NS3-helicase inhibitor                              |
| 0,144 | 0,004 | CDC25B inhibitor                                        |
| 0,188 | 0,049 | Alkaline phosphatase inhibitor                          |
| 0,282 | 0,151 | Prion diseases treatment                                |
| 0,324 | 0,196 | Glycosylphosphatidylinositol phospholipase D inhibitor  |
| 0,126 | 0,009 | Estradiol 17 beta dehydrogenase 2 inhibitor             |
| 0,218 | 0,105 | Transcription factor inhibitor                          |
| 0,295 | 0,185 | Phosphatidylcholine-retinol O-acyltransferase inhibitor |
| 0,281 | 0,172 | RNA-directed RNA polymerase inhibitor                   |
| 0,209 | 0,102 | Glucagon-like peptide 1 agonist                         |
| 0,307 | 0,201 | Neurotransmitter uptake inhibitor                       |
| 0,126 | 0,028 | CDC25A inhibitor                                        |
| 0,111 | 0,013 | Dysmenorrhea treatment                                  |
| 0,151 | 0,068 | Hexokinase inhibitor                                    |
| 0,314 | 0,232 | CYP2J2 substrate                                        |
| 0,185 | 0,104 | Stroke treatment                                        |
| 0,225 | 0,145 | Antimycobacterial                                       |
| 0,090 | 0,016 | Protein-tyrosine phosphatase 2C inhibitor               |
| 0,261 | 0,188 | EIF4E expression inhibitor                              |
| 0,154 | 0,081 | Tetrahydroxynaphthalene reductase inhibitor             |
| 0,219 | 0,148 | CYP2C19 inhibitor                                       |
| 0,177 | 0,106 | Pediculicide                                            |
| 0,202 | 0,136 | Chloride channel activator                              |
| 0,198 | 0,135 | X-methyl-His dipeptidase inhibitor                      |
| 0,159 | 0,097 | Myeloblastin inhibitor                                  |
| 0,131 | 0,069 | Glycine receptor agonist                                |
| 0,226 | 0,165 | Analgesic, non-opioid                                   |
| 0,124 | 0,064 | Beta lactamase inhibitor                                |
| 0,129 | 0,069 | Tardive dyskinesia treatment                            |
| 0,262 | 0,208 | Venombin AB inhibitor                                   |
| 0,131 | 0,079 | Nicotinic alpha6 receptor agonist                       |
| 0,209 | 0,159 | Cardiotonic                                             |
| 0,165 | 0,117 | Prostaglandin E1 antagonist                             |
| 0,117 | 0,069 | Somatostatin 2 agonist                                  |
| 0,115 | 0,068 | Renal failure treatment                                 |
| 0,179 | 0,134 | Glucan 1,4-alpha-maltotetraohydrolase inhibitor         |
| 0,283 | 0,238 | Complement factor D inhibitor                           |
| 0,206 | 0,163 | L-glutamate oxidase inhibitor                           |
| 0,269 | 0,227 | Gastrin inhibitor                                       |
| 0,209 | 0,169 | CYP2C29 substrate                                       |
| 0,127 | 0,087 | Mcl-1 antagonist                                        |
| 0,097 | 0,060 | Heme oxygenase inhibitor                                |
| 0,099 | 0,063 | Cathepsin G inhibitor                                   |
| 0,284 | 0,249 | Trans-acenaphthene-1,2-diol dehydrogenase inhibitor     |

|       |       |                                                                                                 |
|-------|-------|-------------------------------------------------------------------------------------------------|
| 0,140 | 0,108 | Acaricide                                                                                       |
| 0,156 | 0,124 | GABA receptor agonist                                                                           |
| 0,203 | 0,172 | All-trans-retinyl-palmitate hydrolase inhibitor                                                 |
| 0,275 | 0,246 | CYP2J substrate                                                                                 |
| 0,168 | 0,138 | Diuretic                                                                                        |
| 0,304 | 0,275 | Nicotinic alpha4beta4 receptor agonist                                                          |
| 0,041 | 0,013 | Sodium/glucose cotransporter 1 inhibitor                                                        |
| 0,186 | 0,158 | Albendazole monooxygenase inhibitor                                                             |
| 0,226 | 0,199 | JAK2 expression inhibitor                                                                       |
| 0,186 | 0,161 | N-formylmethionyl-peptidase inhibitor                                                           |
| 0,039 | 0,014 | Methionyl aminopeptidase 2 inhibitor                                                            |
| 0,250 | 0,226 | Acetylgalactosaminyl-O-glycosyl-glycoprotein beta-1,3-N-acetylglucosaminyltransferase inhibitor |
| 0,038 | 0,014 | Equilibrative nucleoside transport protein 1 inhibitor                                          |
| 0,214 | 0,195 | Alkenylglycerophosphocholine hydrolase inhibitor                                                |
| 0,209 | 0,190 | CYP17 inhibitor                                                                                 |
| 0,290 | 0,274 | Antiviral (Rhinovirus)                                                                          |
| 0,278 | 0,263 | Mucomembranous protector                                                                        |
| 0,051 | 0,036 | Purinergic P2Y agonist                                                                          |
| 0,105 | 0,091 | Glutamate release inhibitor                                                                     |
| 0,026 | 0,011 | Antibiotic Oxacephem-like                                                                       |
| 0,135 | 0,121 | Antiparkinsonian, tremor relieving                                                              |
| 0,053 | 0,040 | Estradiol 17 beta dehydrogenase inhibitor                                                       |
| 0,077 | 0,067 | UDP-N-acetylmuramate dehydrogenase inhibitor                                                    |
| 0,042 | 0,032 | CXC chemokine 2 receptor antagonist                                                             |
| 0,199 | 0,189 | FMO3 substrate                                                                                  |
| 0,229 | 0,221 | HMGCS2 expression enhancer                                                                      |
| 0,048 | 0,040 | Cyclin-dependent kinase 5 inhibitor                                                             |
| 0,191 | 0,183 | Hypolipemic                                                                                     |
| 0,071 | 0,064 | Scytalone dehydratase inhibitor                                                                 |
| 0,026 | 0,019 | Equilibrative nucleoside transport protein inhibitor                                            |
| 0,152 | 0,146 | Gastric antisecretory                                                                           |
| 0,110 | 0,104 | DELTA24-sterol reductase inhibitor                                                              |
| 0,067 | 0,065 | Preterm labor treatment                                                                         |
| 0,170 | 0,170 | Saluretic                                                                                       |
